# Supplementary material for: Chromatin Environment and Cellular Context Specify Compensatory Activity of Paralogous MEF2 Transcription Factors
Source: PubMed Central journal article supplement — Cell Rep. Author manuscript; Available in PMC 2019 Nov 22. (PMC6874310; doi:10.1016/j.celrep.2019.10.033), 2019-11-12
Supplement: NIHMS1542918-supplement-3.pdf [file NIHMS1542918-supplement-3.pdf]

## Chromatin Environment and Cellular Context Specify Compensatory Activity of Paralogous MEF2 Transcription Factors

### Graphical Abstract

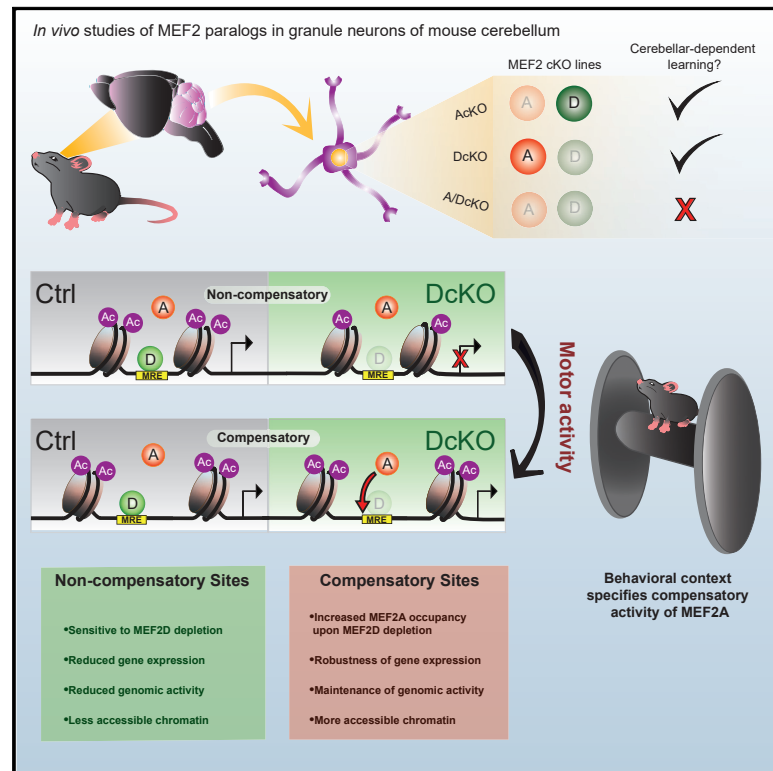

### Authors

Shahriyar P. Majidi, Naveen C. Reddy, Michael J. Moore, ..., Linda S. Hu, Michael E. Greenberg, Azad Bonni

### Correspondence

bonni@wustl.edu

### In Brief

Majidi et al. study how transcription factors respond to paralog depletion by conditionally depleting MEF2A and MEF2D in mouse cerebellum. Depletion of MEF2D induces functionally compensatory genomic occupancy by MEF2A. Compensation occurs within accessible chromatin in a context-dependent manner. This study explores the interdependency between paralogous transcription factors.

### Highlights

- MEF2D is the predominant regulator of gene expression in the cerebellum
- Depletion of MEF2D induces functionally compensatory occupancy by MEF2A
- Compensatory MEF2A activity is concentrated within more accessible chromatin
- Behavioral context plays a key role in specifying compensatory MEF2A activity

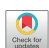

# Chromatin Environment and Cellular Context Specify Compensatory Activity of Paralogous MEF2 Transcription Factors

Shahriyar P. Majidi,<sup>1,2,7</sup> Naveen C. Reddy,<sup>1,7</sup> Michael J. Moore,<sup>1</sup> Hao Chen,<sup>1</sup> Tomoko Yamada,<sup>1,3</sup> Milena M. Andzelm,<sup>6</sup> Timothy J. Cherry,<sup>4,5,6</sup> Linda S. Hu,<sup>6</sup> Michael E. Greenberg,<sup>6</sup> and Azad Bonni<sup>1,8,\*</sup>

<sup>1</sup>Department of Neuroscience, Washington University School of Medicine, St. Louis, MO 63110, USA

<sup>2</sup>MD-PhD Program, Washington University School of Medicine, St. Louis, MO 63110, USA

<sup>3</sup>Faculty of Medicine, University of Tsukuba, Tsukuba, Ibaraki 305-8575, Japan

<sup>4</sup>Department of Pediatrics, University of Washington School of Medicine, Seattle, WA 98101, USA

<sup>5</sup>Center for Developmental Biology and Regenerative Medicine, Seattle Children's Research Institute, 1900 9<sup>th</sup> Ave., Seattle, WA 98101, USA

<sup>6</sup>Department of Neurobiology, Harvard Medical School, Boston, MA 02115, USA

<sup>7</sup>These authors contributed equally

<sup>8</sup>Lead Contact

\*Correspondence: [bonni@wustl.edu](mailto:bonni@wustl.edu)

<https://doi.org/10.1016/j.celrep.2019.10.033>

## SUMMARY

Compensation among paralogous transcription factors (TFs) confers genetic robustness of cellular processes, but how TFs dynamically respond to paralog depletion on a genome-wide scale *in vivo* remains incompletely understood. Using single and double conditional knockout of myocyte enhancer factor 2 (MEF2) family TFs in granule neurons of the mouse cerebellum, we find that MEF2A and MEF2D play functionally redundant roles in cerebellar-dependent motor learning. Although both TFs are highly expressed in granule neurons, transcriptomic analyses show MEF2D is the predominant genomic regulator of gene expression *in vivo*. Strikingly, genome-wide occupancy analyses reveal upon depletion of MEF2D, MEF2A occupancy robustly increases at a subset of sites normally bound to MEF2D. Importantly, sites experiencing compensatory MEF2A occupancy are concentrated within open chromatin and undergo functional compensation for genomic activation and gene expression. Finally, motor activity induces a switch from non-compensatory to compensatory MEF2-dependent gene regulation. These studies uncover genome-wide functional interdependency between paralogous TFs in the brain.

## INTRODUCTION

The development and function of the mammalian brain requires precise control of gene expression (Cholewa-Waclaw et al., 2016; de la Torre-Ubieta and Bonni, 2011; Ziats et al., 2015). Combinatorial interactions of DNA-binding transcription factors (TFs) regulate diverse gene programs that specify neuronal

sub-types, develop and refine circuits, and link sensory experience to adaptive responses of the brain (Mazzoni et al., 2013; Molyneaux et al., 2007; Kawashima et al., 2013; Pulimood et al., 2017; Sharma et al., 2019). Additionally, deregulation of TFs contributes to the pathogenesis of neurological diseases (Porter et al., 2018; Ebert and Greenberg, 2013; Li et al., 2018). Although genome-wide patterns of TF cooperation are just beginning to be revealed in the nervous system, how TF family members cooperate to orchestrate gene expression in the mammalian brain remains poorly understood.

The majority of mammalian TFs are members of multigene families that have evolved by duplication events of a single TF (Teichmann and Babu, 2004; Levine and Tjian, 2003). Members of a multigene TF family, known as paralogous TFs, typically have highly conserved DNA-binding domains. Because paralogous TFs often bind virtually identical short DNA sequences, they are thought to participate in cooperative mechanisms distinct from their non-paralogous counterparts (Weirauch et al., 2014; Wei et al., 2010; Luna-Zurita et al., 2016). However, despite the prevalence of paralogous TFs, the nature and importance of the coordinated function of paralogous TFs at a genome-wide level remains unexplored.

Importantly, paralogous TFs are thought to confer genetic robustness to cellular processes through evolutionary retention of functionally redundant activities (Macneil and Walhout, 2011). Despite the prevalence of phenotypic redundancy, the underlying molecular mechanisms by which paralogous TFs regulate this widespread phenomenon are relatively unexplored. Individual overexpression studies of paralogous TFs in *Saccharomyces cerevisiae* have revealed similar DNA-binding specificities to exogenous DNA sequences (Fuxman Bass et al., 2015). Recently, individual transfection of Hox proteins followed by chromatin profiling yielded insights into their binding distribution in insect cells (Porcelli et al., 2019). Although similar studies have advanced our understanding of paralogous TF binding, how endogenous TFs dynamically respond within the chromatin context to paralog depletion remains unknown and will require the integrative study of

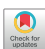

co-expressed paralogous TFs. Regional and single cell analyses of gene expression in the developing and adult brain have revealed diverse expression patterns of paralogous TFs, suggesting that they may act in concert to impart genetic robustness during brain development and function (Lyons et al., 1995; Saunders et al., 2018). However, *in vivo* mechanisms of paralogous TF interplay, and their roles in neuronal gene expression and function are as of yet unknown.

The MEF2 (myocyte enhancer factor 2) proteins play fundamental roles in the development and function of the brain, and deregulation of MEF2 activity contributes to the pathogenesis of neurological diseases (Shalizi and Bonni, 2005; Yap and Greenberg, 2018; Lipton et al., 2009). However, the interdependency and functional output of paralogous MEF2 proteins on a genome-wide scale have not yet been explored. The four vertebrate MEF2 family members, MEF2A–D, share a highly conserved MADS domain that mediates DNA binding to the consensus MEF2 response element (MRE) YTAWWWWTAR (Flavell et al., 2008; Potthoff and Olson, 2007). Expression studies show different but overlapping patterns of MEF2A–D expression in the brain (Lyons et al., 1995; Potthoff and Olson, 2007), suggesting that distinct combinations of MEF2 family members coordinate gene expression (Estrella et al., 2015). MEF2 family members play key roles in neuronal survival, differentiation, and maturation (Gaudilliere et al., 2002; Flavell et al., 2006; Yamada et al., 2013), as well as neural plasticity (Rashid et al., 2014; Chang et al., 2017; Chen et al., 2012; Pulipparacharuvil et al., 2008). Importantly, MEF2 factors are thought to confer phenotypic robustness to these neuronal processes across multiple brain regions. Despite the significant and diverse roles of MEF2 proteins in the nervous system, mechanisms of combinatorial gene regulation by these factors remain to be elucidated.

Here, we reveal an *in vivo* interdependent mechanism of gene regulation mediated by the paralogous TFs MEF2A and MEF2D in granule neurons of mouse cerebellum. Despite strong co-expression of MEF2A and MEF2D and high amino acid identity of their respective DNA-binding domains, genome-wide profiling shows that MEF2D appears to be the predominant regulator of gene expression in granule neurons in the mouse cerebellum. Strikingly, upon MEF2D depletion, the genomic occupancy of MEF2A robustly increases at a distinct subpopulation of formerly bound MEF2D sites, revealing differential compensation by MEF2A on a genome-wide level. Epigenome and transcriptome analyses reveal that sites experiencing compensatory MEF2A occupancy undergo functional compensation for genomic activation and gene expression. In contrast, a distinct population of sites without compensatory MEF2A activity undergo significant dysregulation upon loss of MEF2D. The two populations of MEF2 target sites are further stratified by relative chromatin accessibility, with compensatory MEF2A activity concentrated within more open chromatin. Behavioral context also plays a key role in specifying MEF2A compensatory activity, as revealed by a dynamic switch from non-compensatory to compensatory MEF2-dependent gene regulation in the context of motor activity. Collectively, our study defines a compensatory transcriptional regulatory scheme for MEF2A and MEF2D that imparts genetic robustness during mammalian

brain development and function, hence providing insight into the functional interdependency between paralogous TFs.

## RESULTS

### MEF2A and MEF2D Regulate Cerebellar-Dependent Motor Learning in a Compensatory Manner

Granule neurons of the mouse cerebellum provide a uniquely robust model to study the interplay of MEF2 family members in the mammalian brain. Whereas other neuronal subtypes solely express one MEF2 or variable levels of three or four MEF2 family members, cerebellar granule neurons strongly co-express MEF2A and MEF2D (Lyons et al., 1995). Importantly, granule neurons vastly outnumber all other cells in the cerebellum, making these neurons a suitably homogeneous cell type for *in vivo* studies of the neuronal epigenome (Yamada et al., 2014; Yang et al., 2016; Frank et al., 2015).

In granule neurons of mouse cerebellum, the temporal expression of MEF2A and MEF2D coincides with the expression of the granule-neuron-enriched protein GABA(A) $\alpha$ 6 receptor (G6R) (Lin and Bulleit, 1996). Therefore, to characterize the roles of MEF2A and MEF2D in granule neurons, we used a G6R-promoter-driven Cre transgenic line to conditionally knock out *Mef2a* (AcKO), *Mef2d* (DcKO), or both *Mef2a* and *Mef2d* (ADcKO) selectively in granule neurons (Figure 1A) (Fünfschilling and Reichardt, 2002; Andzelm et al., 2015, 2019). The expression of MEF2A and MEF2D proteins concurrently increased in the mouse cerebellum as granule neurons differentiate and mature (Roussel and Hatten, 2011; de la Torre-Ubieta and Bonni, 2011), reaching peak levels at postnatal day 15 (P15) and continuing into adulthood (Figure 1B). MEF2A and MEF2D proteins were downregulated specifically in the internal granule layer of the cerebellar cortex during the third postnatal week in AcKO and DcKO mice, respectively (Figures 1B and 1C). Importantly, conditional knockout of MEF2A failed to effectively alter the levels of MEF2D RNA or protein, and conversely conditional knockout of MEF2D failed to effectively alter the levels of MEF2A RNA or protein in the cerebellum (Figure 1B; Figure S1A).

In immunohistochemical analyses, MEF2D expression was predominantly restricted to granule neurons and Purkinje cells, whereas MEF2A was expressed in granule neurons and other neurons of the molecular and internal granule layers (Figure 1C). MEF2B was undetectable, and MEF2C was expressed predominantly in Purkinje cells (Figure 1C; Figure S1B; Mellén et al., 2012). In RNA sequencing analyses of the mouse cerebellum, mRNA copy numbers of MEF2A, C, and D were 37.42, 6.55, and 56.74 RPKM (reads per kilobase of transcript, per million mapped reads), respectively. Thus, MEF2A and MEF2D were in the top 10% of detected transcripts, whereas MEF2C was in the lower 50<sup>th</sup> percentile of detected transcripts. MEF2B transcript levels were undetectable by RNA sequencing of mouse cerebellum. These data show that MEF2A and MEF2D are robustly expressed in granule neurons of the developing mouse cerebellum.

To determine whether MEF2A and MEF2D are required for the proper function of granule neurons, we first subjected AcKO, DcKO, and ADcKO mice to the cerebellar-dependent eyeblink

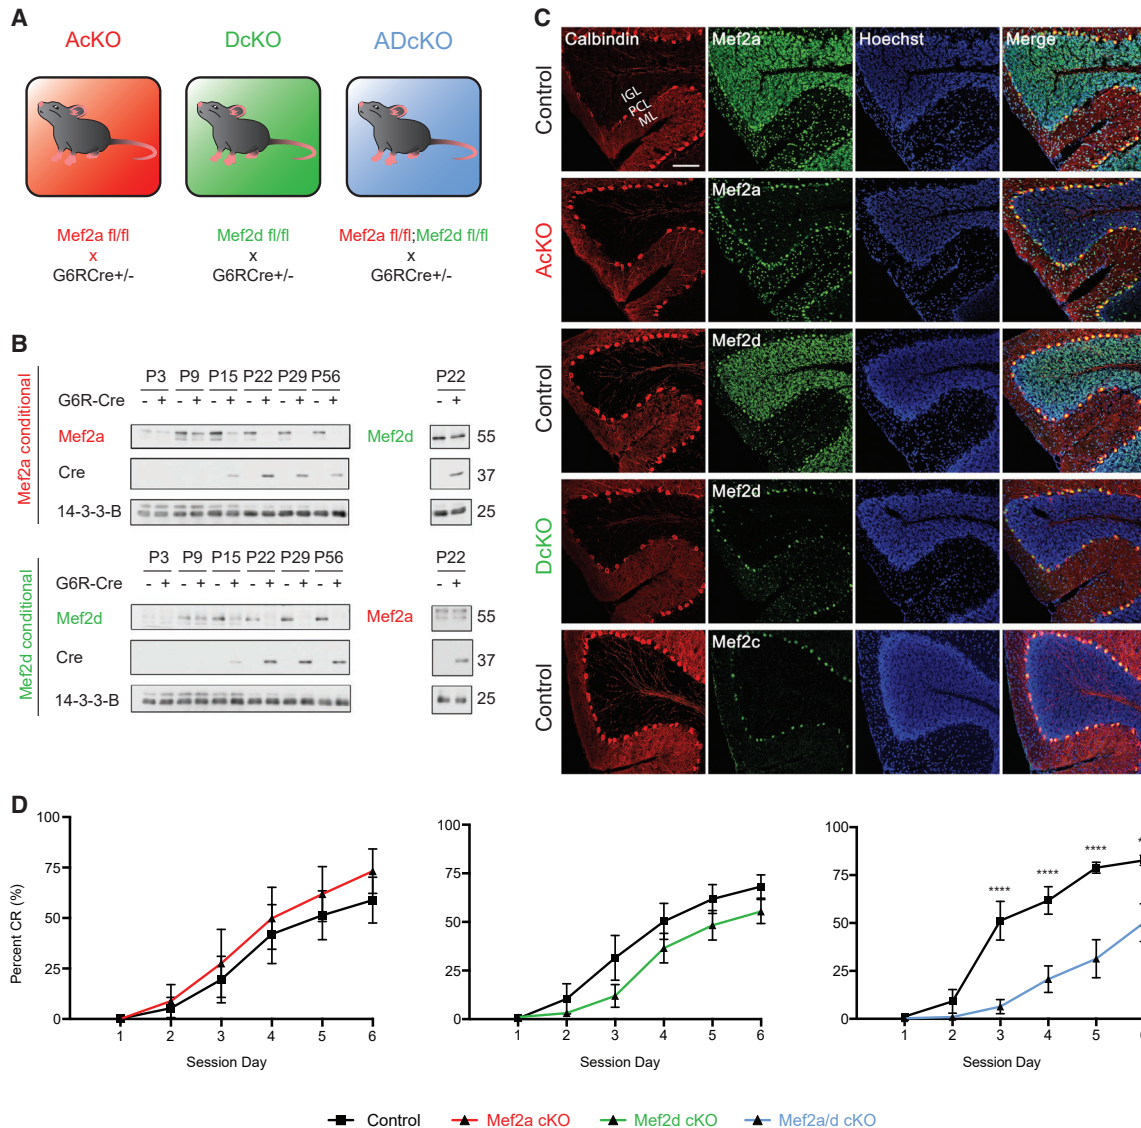

### Figure 1. MEF2A and MEF2D Regulate Cerebellar-Dependent Motor Learning in a Compensatory Manner

(A) Schematic depiction of single- and double-conditional knockouts of MEF2A and MEF2D in cerebellar granule neurons in mice. Transgenic mice expressing the recombinase Cre downstream of the granule-neuron-enriched GABA(A) $\alpha$ 6-receptor (G6R) gene promoter are crossed to mice harboring conditional alleles for *Mef2a*, *Mef2d*, or both *Mef2a* and *Mef2d* to generate *Mef2a<sup>fl/fl</sup>;G6RCre<sup>+/-</sup>* (AcKO), *Mef2d<sup>fl/fl</sup>;G6RCre<sup>+/-</sup>* (DcKO), and *Mef2a<sup>fl/fl</sup>;Mef2d<sup>fl/fl</sup>;G6RCre<sup>+/-</sup>* (ADcKO), respectively.

(B) Immunoblotting of MEF2A (top left) and MEF2D (bottom left) in lysates of cerebellum harvested from postnatal day 3 through 56 (P3–P56) AcKO (top) and DcKO (bottom) mice, respectively. Immunoblotting also performed for MEF2D in P22 AcKO mice (top right) and MEF2A in P22 DcKO mice (bottom right).

(C) Sagittal sections of P22 cerebellum from different MEF2 conditional knockout mouse lines were subjected to immunohistochemistry by using antibodies recognizing calbindin (first column), and brain-enriched MEF2 family members (second column), as well as the DNA dye bisbenzidine (Hoechst) (third column). Immunohistochemical analyses of MEF2A performed on control (top row) and AcKO (second row) mouse cerebellum, of MEF2D on control (third row) and DcKO (fourth row) mouse cerebellum, and of MEF2C on control (fifth row) mouse cerebellum. IGL, internal granule layer; PCL, Purkinje cell layer; ML, molecular layer. Scale bar: 100  $\mu$ m, 20 $\times$  magnification.

(D) Cerebellar-dependent eyeblink conditioning learning paradigm was performed on AcKO and control (n = 6 per genotype), DcKO and control (n = 7 and n = 8, respectively), and ADcKO and control (n = 11 and n = 9, respectively) mice. Percent conditioned response (CR) is shown as mean  $\pm$  SEM for each session day. \*\*\*\*p < 10<sup>-4</sup>, \*\*p < 10<sup>-2</sup> repeated-measures ANOVA, Sidak's multiple comparison test.

See also Figure S1.

conditioning learning paradigm (Figure 1D; Heiney et al., 2014; Valnegri et al., 2017). During this associative task, mice learn to blink in response to an initially neutral conditioned stimulus

(blue light) after repeated pairing with an eyeblink-eliciting unconditioned stimulus (pericocular air puff). As expected, the learned eyelid blink conditioned response (CR) gradually

increased each session day in control littermate mice. Strikingly, the rate of CRs was significantly reduced in ADcKO mice by day 3 of conditioning, which persisted for the remaining session days (Figure 1D). However, neither AcKO nor DcKO mice had significant learning deficits (Figure 1D). In other analyses, general motor coordination assessed by the accelerating rotarod and DigiGait assays (Puram et al., 2011; Hurlock et al., 2009) was not affected upon knockout of MEF2A, MEF2D, or both proteins (Figures S1C and S1D). Taken together, these data reveal that MEF2A and MEF2D are required redundantly in cerebellar-dependent learning, suggesting a potential compensatory mechanism of MEF2A and MEF2D in granule neurons.

Because MEF2 family members regulate neuronal survival and synapse formation and refinement in diverse brain regions (Shalizi et al., 2006; Flavell et al., 2006; Gaudilliere et al., 2002), we next characterized the effect of combined knockout of MEF2A and MEF2D on these fundamental developmental events. The architecture of the cerebellar cortex was not altered in ADcKO mice, nor was there a detectable change in neuronal survival (Figure S1E). In electron microscopy analyses, the density of granule neuron parallel fiber boutons synapses onto Purkinje neuron dendritic spines was not significantly altered in ADcKO mice (Figure S1F). *In vivo* electroporation of granule neurons in ADcKO mice followed by morphological analyses of their dendrites revealed no differences in dendrite length (Figure S1G).

### MEF2A and MEF2D Exhibit Complex Patterns of Gene Regulation in the Cerebellum

Because of the redundant contribution of MEF2A and MEF2D to cerebellar dependent motor learning, we reasoned that the two paralogous TFs may exert compensatory mechanisms of gene regulation. To test this possibility, we first characterized the relative effects of individual and combined conditional knockouts of MEF2A and MEF2D on gene expression in granule neurons *in vivo*. We, therefore, performed RNA-seq in the cerebellum from P22 mice in four biological replicates each of AcKO, DcKO, ADcKO, and respective sex-matched control littermates.

We next characterized how genetic depletion of MEF2A or MEF2D individually contributes to gene dysregulation in the combined MEF2A and MEF2D knockout. Differential mRNA expression analysis of ADcKO and control littermates led to the identification of 130 “MEF2-repressed genes” that were significantly upregulated and 175 “MEF2-activated” genes that were significantly downregulated in the ADcKO mouse cerebellum. Principal component analysis of MEF2-regulated genes showed smaller variation between control littermates for each condition, with the majority caused by differences between the three conditional knockout conditions (Figure S2A). The MEF2-regulated genes were then organized into distinct clusters based on their expression in AcKO, DcKO, ADcKO, and respective control littermates by subjecting them to hierarchical clustering by using the dynamic tree cut algorithm (Figure 2A). This analysis yielded two major clusters each for MEF2-repressed (C1, C2) and activated genes (C3, C4), which respectively represent ~14.8%, 27.9%, 20.7%, and 36.7% of MEF2-regulated genes. Quantitative assessment of the relative

behavior of single- and double-conditional knockouts on gene expression in each cluster revealed significantly stronger effects in DcKO mice compared to AcKO and control mice across all four identified clusters (Figure 2B). These data suggest that depletion of MEF2D predominantly affects gene expression in comparison to the modest effects of MEF2A depletion in granule neurons.

Two major patterns emerged upon closer examination of clusters of significantly altered genes between DcKO and ADcKO mice. First, the C1 and C3 clusters of differentially regulated genes in the mouse cerebellum displayed no significant differences between DcKO and ADcKO mice, suggesting that these groups of genes are primarily affected by the depletion of MEF2D in granule neurons of the mouse cerebellum. In contrast, the C2 and C4 clusters showed significantly stronger dysregulation in ADcKO relative to DcKO mice (Figure 2C; Figure S2B), suggesting compensatory regulation of C2 and C4 cluster genes by MEF2A and MEF2D in granule neurons.

### MEF2A Displays Functionally Compensatory Binding Activity at a Distinct Subset of MEF2D-Bound Genomic Sites

The gene expression patterns in single- and double-conditional knockout mice suggested shared as well as distinct roles for MEF2A and MEF2D. To better understand the underlying basis of the relationships between these two paralogous TFs, we performed chromatin immunoprecipitation sequencing (ChIP-seq) of MEF2A and MEF2D in the cerebellum in control, AcKO, and DcKO mice. Among these three conditions, we identified 203 MEF2A-binding sites and 1388 MEF2D-binding sites (Figure 3A). Due to the strong conservation between paralogous TFs, we validated the specificity of MEF2A and MEF2D ChIP-seq signal in the cerebellum of AcKO and DcKO mice, respectively (Figures S3A and S3B). *De novo* motif discovery demonstrated the canonical MRE YTAWWWATAR as the most significantly enriched motif at >95% of peaks (Figure 3B), further strengthening the conclusion that the identified MEF2A and MEF2D ChIP-seq sites represent high confidence MEF2-binding sites. Analyses of promoters and enhancers, identified based on histone modifications in ChIP-seq of the mouse cerebellum in P22 mice (Figures 3A and 3C; Figure S3D; Yamada et al., 2014), revealed that MEF2A and MEF2D bound active intergenic enhancers at a frequency higher than the normal genomic distribution. However, MEF2A proportionally bound promoters to a greater extent than MEF2D (Figure 3C).

Strikingly, the vast majority of MEF2A peaks exclusively appeared in DcKO mice, in which 199 sites were statistically enriched above background (Figure 3A). The dynamic upregulation of MEF2A binding activity upon depletion of MEF2D was highly consistent, appearing in each of the four biological ChIP-seq replicates (Figure 3A; Figure S3C). In contrast, MEF2D was stably present at the majority of MEF2-bound sites in the control condition, with its occupancy mostly unaffected by conditional knockout of MEF2A. These data suggest that MEF2D may play the predominant role in regulating gene expression in granule neurons.

Because MEF2A and MEF2D both bind to the canonical MRE, we next determined the extent of overlap between DcKO-

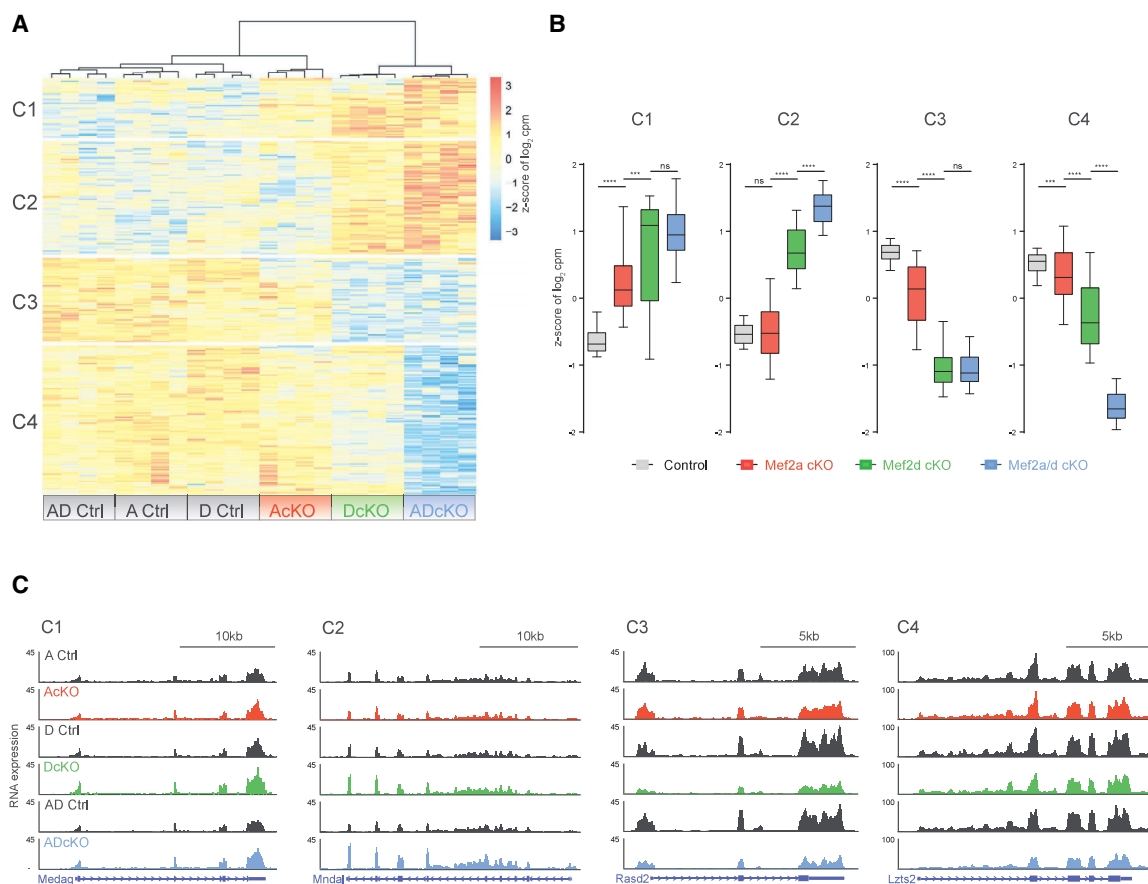

**Figure 2. MEF2A and MEF2D Exhibit Complex Patterns of Gene Regulation in Cerebellum**

(A) Hierarchical clustering of gene expression of AcKO, DcKO, ADcKO, and respective control (Ctrl) P22 mouse cerebellum for genes detected as significantly dysregulated (false discovery rate [FDR], <0.05) in analysis of RNA-seq from Ctrl and ADcKO cerebellum (n = 4 biological replicates per genotype). Four clusters are indicated on the left side of the heatmap. Heat represents Z score of log<sub>2</sub> cpm (counts per million) for a given gene.

(B) Box-whisker plots representing median and distribution of the Z score of log<sub>2</sub> cpm for control, AcKO, DcKO, and ADcKO mice show distinct trends in gene expression for each of the four clusters (C1–C4) of genes identified in (A). \*\*\*\*p < 10<sup>−4</sup>, \*\*\*p < 10<sup>−3</sup>, one-way ANOVA, Tukey’s multiple comparison test; n.s., not significant.

(C) WashU Epigenome browser view of RNA-seq coverage from AcKO, DcKO, ADcKO, and respective control (Ctrl) mice, illustrating changes in gene expression for each of the four clusters (C1–C4).

See also [Figure S2](#).

induced MEF2A peaks and sites normally occupied by MEF2D. Intersectional peak analysis revealed that conditional knockout of MEF2D induced a robust increase of MEF2A mainly at sites previously bound by MEF2D (Figure 3D). Specifically, 80% of MEF2A peaks that appeared in DcKO mice were occupied by MEF2D in control littermate mice. Heretofore, we refer to sites at which MEF2A increased in DcKO mice as compensatory (Figure 3D), whereas the subset of MEF2D sites that did not experience MEF2A binding statistically enriched above the background are termed non-compensatory (Figure 3E). As an example of a compensatory MEF2 binding site, the *Inpp4b* intragenic enhancer showed binding to MEF2D in control mice, whereas MEF2A occupancy was statistically undetectable (Figure 3I). However, the absence of MEF2D in DcKO mice led to significantly increased MEF2A occupancy at the *Inpp4b* intragenic enhancer. In contrast, an example of a non-compensatory

binding site is a normally MEF2D-bound proximal enhancer for *Gng7*, at which no MEF2A occupancy was observed in DcKO mice (Figure 3J).

The finding that MEF2A displays compensatory binding at a subset of MEF2D sites raises the question of whether the strength of MEF2D occupancy at a given site dictates the extent of MEF2A compensatory binding. We found no correlation between MEF2A and MEF2D signal intensity at compensatory sites, suggesting that the strength of MEF2D occupancy is not predictive of the degree to which MEF2A binds a given site (Figures 3F and 3G).

To determine whether regulation of compensatory sites depends on MEF2A and MEF2D, we analyzed the levels of histone H3 lysine 27 acetylation (H3K27ac) at these sites upon single- or double-conditional knockout of the two TFs (Figure 3H). As expected, because compensatory sites were predominantly

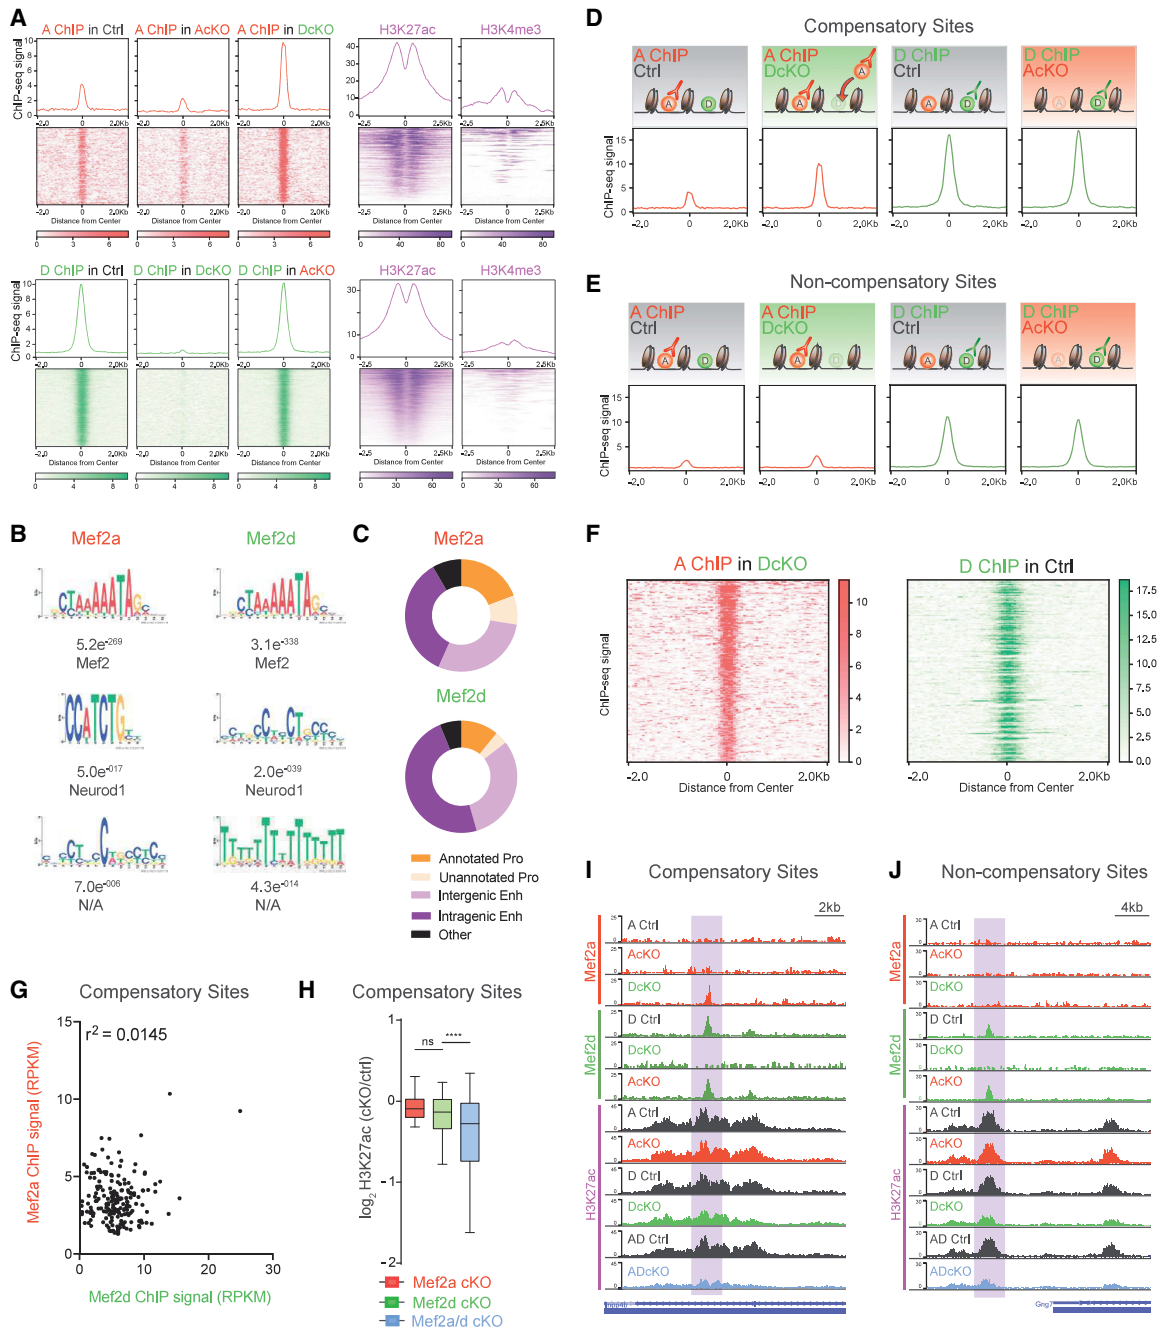

**Figure 3. MEF2A Displays Functionally Compensatory Binding Activity at a Subset of MEF2D-Bound Genomic Sites**

(A) Aggregate plot and heatmap of ChIP-seq signal for MEF2A (red,  $n = 203$ ) and MEF2D (green,  $n = 1388$ ) genomic binding sites in Ctrl, AcKO, and DcKO P22 mouse cerebellum ( $n = 3-4$  biological replicates per ChIP condition). ChIP-seq signal for H3K27ac and H3K4me3 (purple) from P22 mouse cerebellum centered on MEF2 genomic binding sites.

(B) Significantly enriched *de novo* binding motifs at MEF2A and MEF2D peaks. Below each position, weighted matrix is the E-value followed by the most significant match to a TF motif.

(C) Pie charts displaying regulatory element distribution of MEF2A (top) and MEF2D (bottom) peaks. Pro, promoter; Enh, enhancer. For regulatory element distribution of genomic background, refer to Figure S3D.

(D) MEF2D sites experiencing increased MEF2A occupancy in DcKO mouse cerebellum are termed compensatory. Aggregate plots are shown for MEF2A and MEF2D ChIP-seq performed in different control (Ctrl) or cKO mice. A schematic depicts outcome based on the ChIP-seq peak signal detected in each condition.

(E) Non-compensatory sites, defined as control MEF2D sites without increased MEF2A binding in DcKO mouse cerebellum, are shown. Aggregate plots are shown for MEF2A and MEF2D ChIP-seq performed in different control (Ctrl) or cKO mice. A schematic depicts outcome based on the ChIP-seq peak signal detected in each condition.

(legend continued on next page)

bound to MEF2D in control mice, conditional knockout of MEF2A minimally affected H3K27ac levels at these sites (Figures 3H and 3I). Conditional knockout of MEF2D also failed to significantly alter H3K27ac levels at these sites (Figures 3H and 3I). By contrast, H3K27ac levels were significantly reduced at compensatory sites upon conditional knockout of both MEF2A and MEF2D (Figures 3H and 3I), suggesting that either MEF2A or MEF2D is sufficient for activation of these regulatory sites. Just as for compensatory sites, conditional knockout of MEF2A had minimal effects on H3K27ac levels at non-compensatory sites. In contrast, however, conditional knockout of MEF2D significantly reduced H3K27ac levels at non-compensatory sites (Figure 3J; Figure S3E), suggesting that MEF2D is selectively required for activation of non-compensatory sites. Taken together, our data suggest that the dynamically increased occupancy of MEF2A at compensatory sites may confer on these targets a uniquely robust ability to maintain normal activation in the presence of a single MEF2 factor.

#### Compensatory Binding by MEF2A at a Subset of MEF2-Activated Target Genes Confers Genetic Robustness to MEF2D Depletion

To understand how MEF2A and MEF2D occupancy regulates gene expression, we first identified MEF2 target genes by performing an intersectional analysis of all MEF2 ChIP-seq and MEF2 activated/repressed genes. These analyses revealed that MEF2A and MEF2D bound in the vicinity of 49.1% of MEF2-activated genes. In contrast, only 9.2% of MEF2-repressed genes were associated with MEF2-binding sites (Figure 4A). Next, we analyzed patterns of MEF2 occupancy for each of the RNA-seq clusters, C1–C4. Remarkably, the two MEF2-activated clusters C3 and C4 exhibited distinct patterns of MEF2A and MEF2D target gene occupancy. The C3 cluster was solely enriched for MEF2D-occupied non-compensatory sites, consistent with the finding that these MEF2D-bound genes are primarily dysregulated upon depletion of MEF2D (Figure 4B). In contrast, C4 was the only cluster of genes with significant enrichment of compensatory MEF2A and MEF2D occupancy (Figure 4B). In other analyses, H3K27ac levels at compensatory direct target gene regulatory elements were most significantly reduced in ADcKO mice (Figure 4C). At non-compensatory direct target genes, DcKO and ADcKO mice showed similarly reduced levels of H3K27ac (Figure S4A), suggesting relatively stronger sensitivity to genetic perturbation of MEF2D. As an example of a compensatory MEF2-binding site, the stimulus-responsive gene *Tll1* also exhibited compensatory MEF2A occupancy at an intragenic enhancer, at which H3K27ac levels were reduced most strongly in ADcKO mice. RNA-seq coverage at *Tll1* showed substantial

reduction in ADcKO mice (Figure 4D). In contrast, a loss of MEF2D at the intragenic enhancer of the *Bic9l* gene did not lead to compensatory MEF2A binding, which was associated with a significant reduction of H3K27ac levels at this regulatory element and reduced gene expression in both DcKO and ADcKO mice (Figure 4E). In summary, compensatory binding by MEF2A at a subset of MEF2-activated target genes diminishes the influence of MEF2D depletion on gene expression and associated regulatory element activation.

#### Chromatin Accessibility and Cellular State Specify Compensatory Action of MEF2A

To investigate the basis for distinct MEF2A compensatory activities, we next compared genomic features at compensatory and non-compensatory MEF2-regulated sites. Because the MRE directly binds both MEF2A and MEF2D, we first characterized whether MREs at compensatory versus non-compensatory sites exhibit different levels of degeneracy. These analyses revealed no significant difference in the distribution of MRE degeneracy scores between compensatory and non-compensatory sites (Figure 5A; Figure S5A), suggesting factors beyond the MRE sequence direct compensatory action of MEF2A.

In addition to binding site affinity, the chromatin environment plays a critical role in regulating the permissibility of TF binding (Spitz and Furlong, 2012). To assess the relationship of chromatin accessibility and compensatory MEF2A activity, we compared DnaseI sequencing levels between compensatory and non-compensatory sites in P22 mouse cerebellum (Yamada et al., 2019). We found that compensatory sites displayed significantly higher chromatin accessibility than non-compensatory sites, as measured by DNaseI sequencing read density (Figure 5B). Further examination revealed that chromatin accessibility showed a graded relationship to compensatory occupancy by MEF2A. Sites of the highest compensatory occupancy by MEF2A were concentrated in more accessible chromatin, whereas sites in relatively less accessible chromatin were selective for MEF2D (Figures 5C and 5D). These data indicate that chromatin accessibility rather than MRE affinity may restrict target selection by MEF2A to a distinct subset of formerly bound MEF2D sites in conditional MEF2D knockout mice.

Because combinatorial TF occupancy serves as an energetically favorable mechanism to outcompete nucleosomes for a genomic binding site (Lambert et al., 2018; Grossman et al., 2018), we next characterized the presence of other TF-binding sites that may distinguish compensatory and non-compensatory sites. Compensatory MEF2 sites in the cerebellum showed differential motif enrichment for AP-1 complex components compared to non-compensatory MEF2 sites (Figure 5E; Figure S5B). The AP-1 motif is the binding site for the early response

(F) Heatmap of ChIP-seq signal for MEF2A (left) and MEF2D (right) at compensatory sites, sorted in descending order based on MEF2A ChIP-seq signal.

(G) Scatterplot of MEF2A and MEF2D ChIP-seq signal (RPKM) at compensatory sites. Coefficient of determination using Pearson correlation.

(H) For compensatory genomic binding sites, box-whisker plots for  $\log_2$ -transformed fold change of H3K27ac in AcKO, DcKO, and ADcKO over respective control mice. \*\*\*\* $p < 10^{-4}$ , ANOVA followed by Tukey's multiple comparison test. n.s., not significant.

(I) WashU Epigenome Browser view of a compensatory site (highlighted), showing MEF2A, MEF2D, and H3K27ac ChIP-seq coverage from AcKO, DcKO, ADcKO, and respective control (Ctrl) mice.

(J) Same format as (I) for non-compensatory sites.

See also Figure S3.



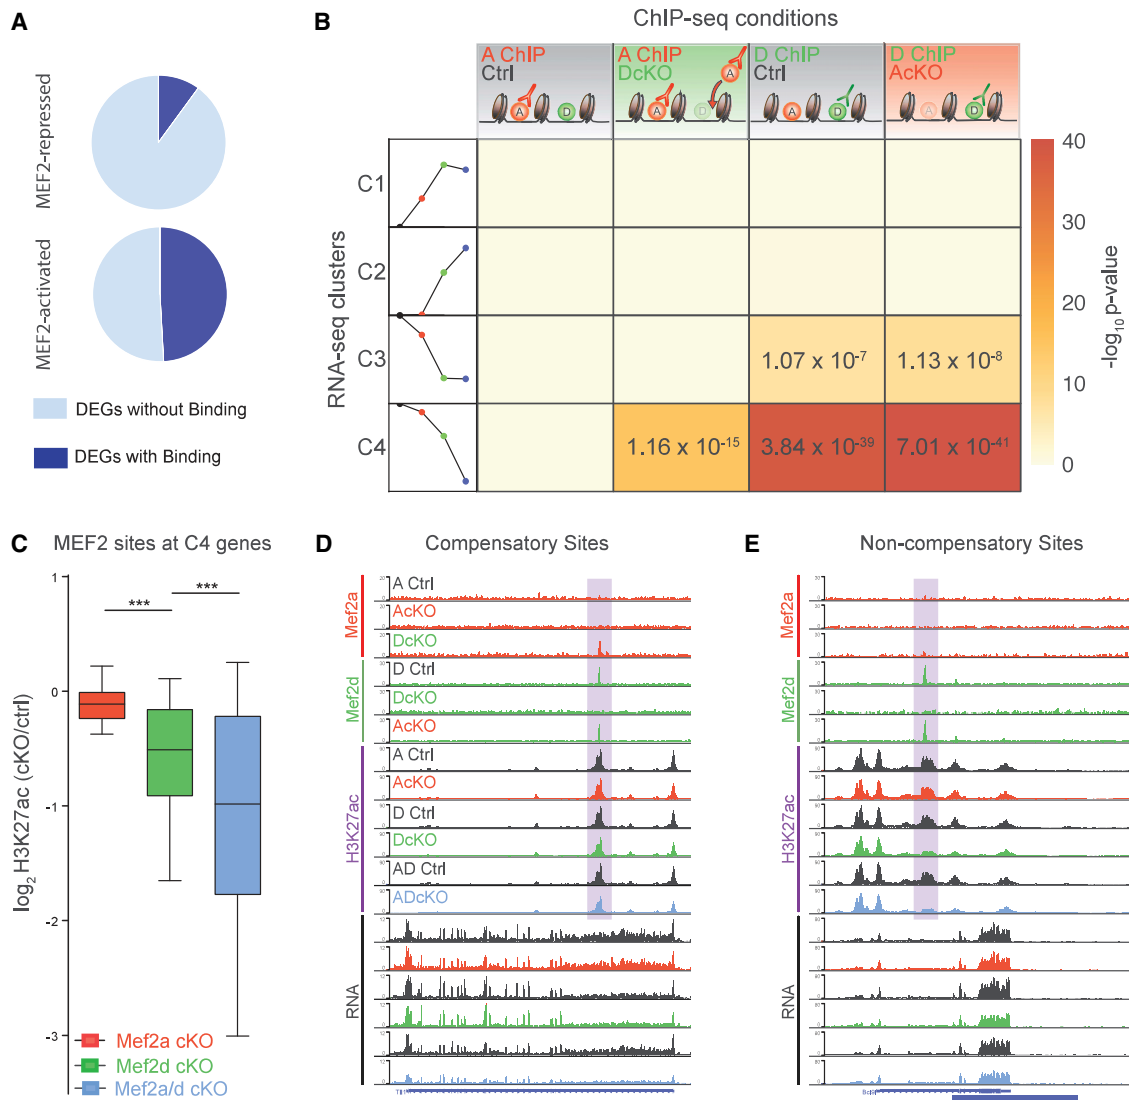

**Figure 4. Compensatory Binding by MEF2A at a Subset of MEF2-Activated Target Genes Confers Robustness to MEF2D Depletion on Gene Expression**

(A) Pie chart representing proportion of MEF2-repressed (top) and MEF2-activated (bottom) genes associated with MEF2A and/or MEF2D genomic binding sites.

(B) Table represents significance of overlap of RNA-seq clusters with MEF2A and MEF2D peaks identified in various ChIP-seq conditions. Columns from left to right: MEF2A ChIP in control mice; MEF2A ChIP in DcKO mice (compensatory sites); MEF2D ChIP in control mice; and MEF2D ChIP in AcKO mice. Rows from top to bottom represent RNA-seq clusters 1, 2, 3, and 4 (C1, C2, C3, and C4), as depicted by a schematic of the trends in gene expression (schematization of Figure 2B): control (black circle), AcKO (red circle), DcKO (green circle), and ADcKO (blue circle) mice. Heat represents  $-\log_{10}$  p value significance of overlap determined by hypergeometric test, with significant values displayed.

(C) For compensatory direct target genes (defined as genes from compensatory C4 associated with MEF2-bound sites): box-whisker plots show median and distribution of  $\log_2$ -transformed fold change of H3K27ac in different conditional knockout mice over respective control mice. \*\*\* $p < 10^{-3}$ , ANOVA followed by Tukey's multiple comparison test.

(D) WashU Epigenome Browser view of an intragenic enhancer site (highlighted) of a compensatory direct target gene, showing MEF2A, MEF2D, and H3K27ac ChIP-seq and RNA-seq coverage from AcKO, DcKO, ADcKO, and respective control (Ctrl) mice.

(E) Same format as (D) for intragenic enhancer site (highlighted) at non-compensatory direct target gene.

See also Figure S4.

proteins FOS and JUN (Eferl and Wagner, 2003; Sheng and Greenberg, 1990). Our interrogation of ChIP-seq datasets of MEF2A and MEF2C binding in cortical neurons (Telese et al., 2015) revealed that sites co-regulated by MEF2A and MEF2C

were also significantly enriched for the AP-1 motif compared to sites solely regulated by MEF2C (Figure 5E; Figure S5B). In accordance with higher accessibility at compensatory than non-compensatory sites, AP-1 is thought to increase chromatin

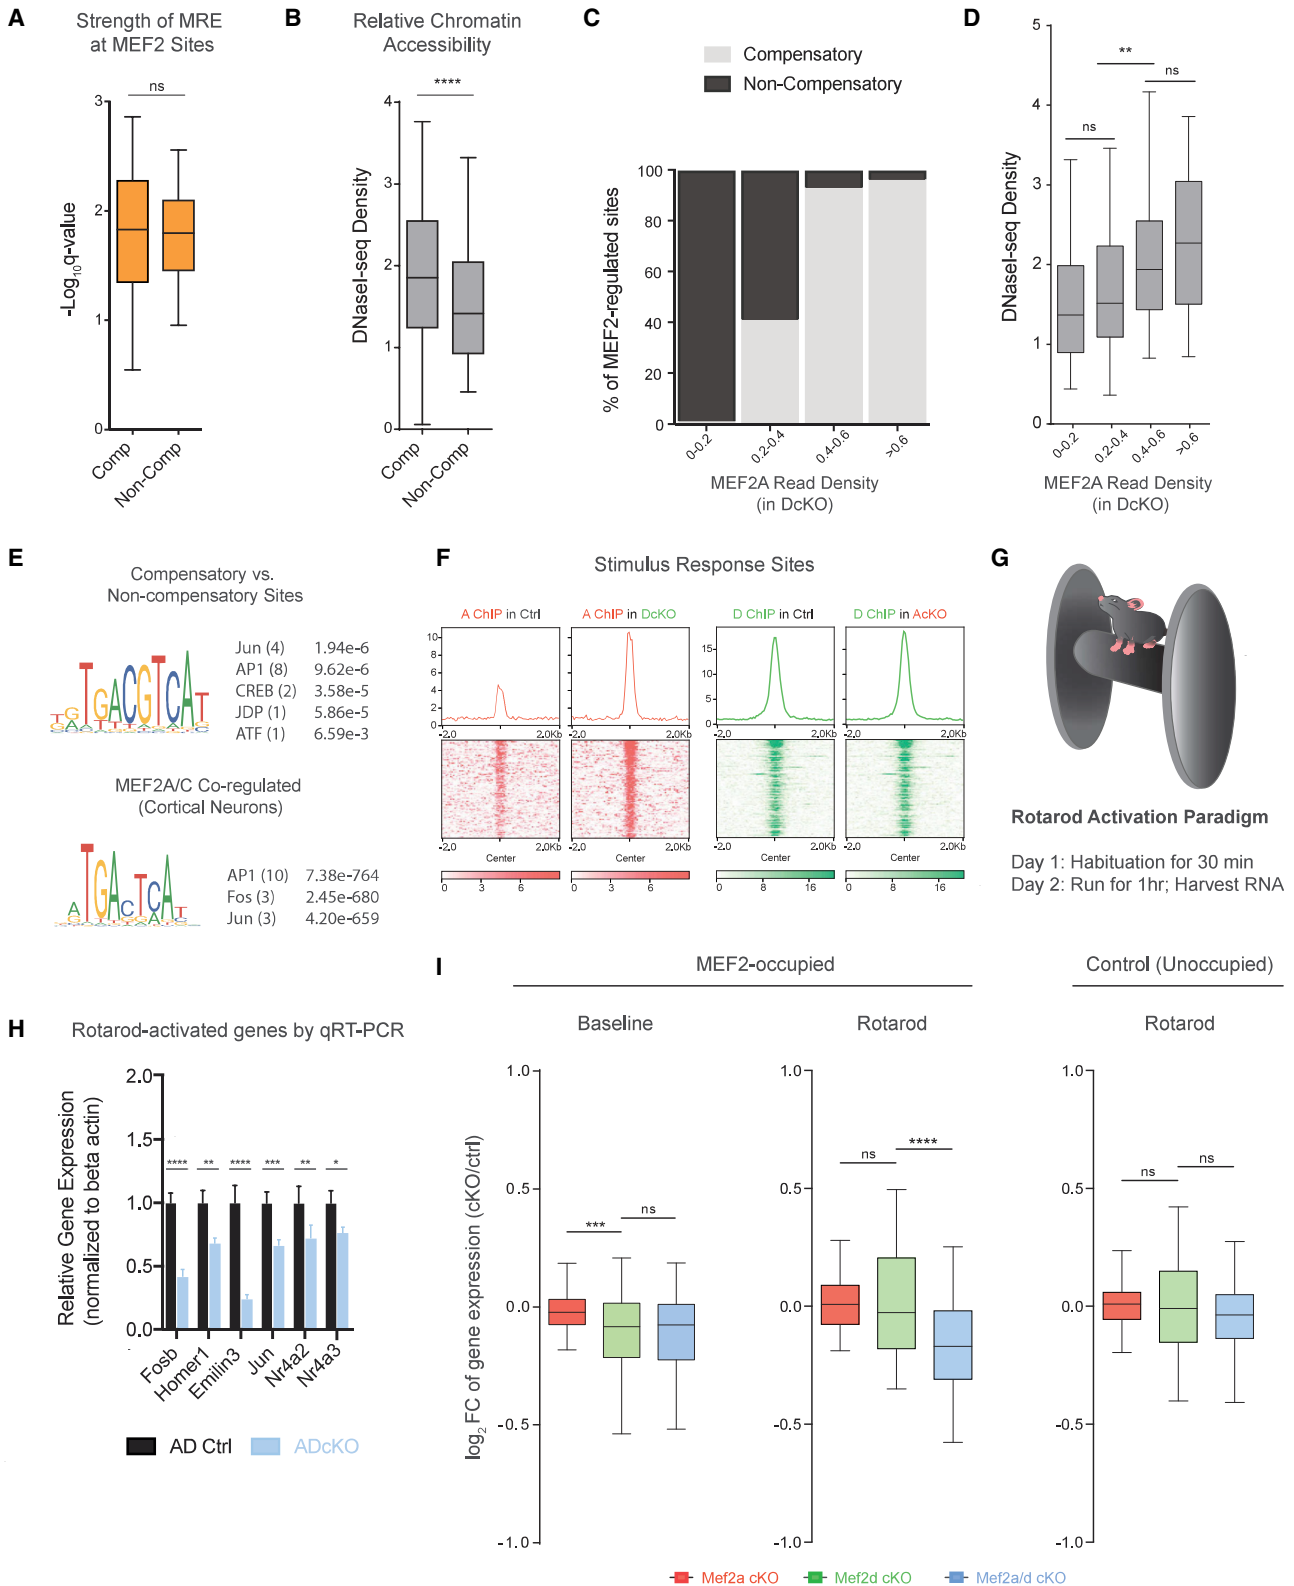

(legend on next page)

accessibility at enhancers by recruitment of the BAF complex (Vierbuchen et al., 2017).

Neuronal stimuli significantly modify the chromatin landscape by increasing accessibility at stimulus-responsive enhancers (Su et al., 2017). Importantly, MEF2 TFs play key roles in neuronal stimulus-dependent gene expression (Assali et al., 2019; Flavell et al., 2008; Lyons et al., 2012). Furthermore, MEF2A and MEF2D display functional redundancy for cerebellar-dependent motor learning (Figure 1D), a process that likely requires stimulus-dependent gene expression to link sensory experiences to adaptive responses of the brain (Yamada et al., 2019). We asked whether neuronal state might influence the compensatory action of MEF2A (Assali et al., 2019; Malik et al., 2014; Ataman et al., 2016; Flavell et al., 2008). Analysis of MEF2A and MEF2D ChIP-seq peaks at stimulus-responsive genes revealed strongly increased MEF2A occupancy at MEF2D-bound sites upon depletion of MEF2D (Figure 5F). Although the expression of stimulus responsive genes is often relatively low in the mouse cerebellum, exposure of mice to forced locomotion in an accelerating rotarod paradigm triggers significant upregulation of canonical immediate early genes and other stimulus-responsive genes in the cerebellum (Figure 5G; Yang et al., 2016). Thus, we performed the accelerating rotarod paradigm followed by qRT-PCR in ADcKO mice on several of the 113 MEF2-bound rotarod-activated genes, including the canonical immediate early genes *Fosb*, *Nr4a2*, and *Nr4a3*. The expression of MEF2-bound rotarod-activated genes was significantly reduced in the cerebellum in ADcKO mice (Figure 5H; Figure S5C), suggesting a role for MEF2 TFs in rotarod-activated gene expression.

We next used an unbiased characterization of MEF2A- and MEF2D-dependent changes in rotarod-activated gene expression by performing the rotarod paradigm followed by RNA-seq in the cerebellum of AcKO, DcKO, or ADcKO mice and their respective control littermates (Figure S5D). Under baseline conditions, MEF2-bound rotarod-activated genes manifested similar dysregulation in both DcKO and ADcKO mice (Figure 5I), suggesting that the MEF2-target genes were regulated in a non-compensatory manner. In contrast, following rotarod

stimulation, MEF2-bound rotarod-activated genes were robustly dysregulated in ADcKO mice compared to single-cKO mice (Figure 5I), revealing that rotarod activity induced a switch to compensatory MEF2-dependent regulation. As expected, control rotarod-activated genes with no MEF2 binding were minimally altered in the cerebellum in AcKO, DcKO, or ADcKO mice (Figure 5I). Together, these results reveal that motor-activity-induced changes in neuronal state induce a dynamic switch from non-compensatory to compensatory MEF2-dependent gene regulation, demonstrating the context-dependent nature of paralogous TF interdependency.

## DISCUSSION

Redundancy is an inherently dynamic process that involves the substitution of one paralog upon the loss of the other (Macneil and Walhout, 2011). However, prior to our study, how paralogs respond to the absence of a family member at a genome-wide level remained unknown. Our study unveils robust compensatory binding activity of MEF2A at sites normally bound to the predominant genomic occupant MEF2D. This finding suggests competitive binding may operate among MEF2 family members, which may be a widespread phenomenon extending to some of the >20 other TF families comprised of paralogs with highly similar DNA-binding domains (Messina et al., 2004). In addition, due to the widespread expression of MEF2 family members, our findings may provide insights into redundant gene regulation in other cell types. For instance, studies in cardiomyocytes have revealed similar roles for MEF2A and MEF2D in the repression of cell cycle genes and the activation of a subset of sarcomeric markers (Desjardins and Naya, 2017). Moreover, both MEF2A and MEF2D may be redundant for neonatal cardiomyocyte survival, as the overexpression of either factor diminished programmed cell death in the context of MEF2A deficiency (Desjardins and Naya, 2017).

In view of the high amino acid identity in the DNA-binding domains of TF paralogs, what features may allow MEF2D to dominate occupancy at sites co-regulated by both MEF2D and MEF2A? Although a higher prevalence of MEF2D-binding sites

### Figure 5. Chromatin Accessibility and Cellular State Specify Compensatory Action of MEF2A

- (A) Box-whisker plot of MRE degeneracy scores relative to a consensus MRE for compensatory and non-compensatory sites. n.s., not significant.
- (B) Box-whisker plot of chromatin accessibility for compensatory and non-compensatory sites. Two-sided unpaired t test, \*\*\*\*p < 10<sup>-4</sup>.
- (C) Plots represent bins of MEF2 sites sorted by increasing MEF2A peak read density in DcKO mice. Relative distribution of compensatory (light gray) and non-compensatory (black) MEF2 sites are shown as percentage (%) of regions comprising each bin.
- (D) Box-whisker plots of DNaseI sequencing read density for bins of increasing MEF2A density in DcKO mice (classified in C). ANOVA followed by Tukey's multiple comparison test. \*\*p < 10<sup>-2</sup>; n.s., not significant.
- (E) (Top) Relative motif enrichment for compensatory sites relative to non-compensatory sites. (Bottom) Relative motif enrichment at MEF2A ChIP peaks (some of which are overlap MEF2C) relative to MEF2C-only ChIP peaks in cortical neurons (Telese et al., 2015). Predicted binding factor followed in parentheses by number of significant motif occurrences and the top q-value representing significance of relative enrichment.
- (F) ChIP-seq signal of MEF2A (red, left) and MEF2D (green, right) at stimulus responsive genes listed in the "Response to Stimulus" Gene Ontology term (GO 0050896).
- (G) Schematic depicting accelerating rotarod paradigm (Yang et al., 2016; Yamada et al., 2019).
- (H) Rotarod paradigm performed for control and ADcKO mice followed by qRT-PCR on cerebellar RNA for select rotarod-activated genes experiencing compensatory MEF2A binding. \*\*\*\*p < 10<sup>-4</sup>, \*\*\*p < 10<sup>-3</sup>, \*\*p < 10<sup>-2</sup>, \*p < 10<sup>-4</sup>, two-way repeated-measures ANOVA, Sidak's multiple comparison test.
- (I) Total RNA-seq analysis of rotarod-activated gene expression in cerebellum of AcKO, DcKO, ADcKO, and respective control mice subjected to the rotarod paradigm (n = 4 biological replicates per condition). Box-whisker plots of log<sub>2</sub>-transformed fold change (FC) of gene expression in AcKO, DcKO, and ADcKO over respective control mice for MEF2-occupied rotarod-activated genes at baseline (left) and after rotarod stimulation (middle), as well as unoccupied rotarod-activated genes after rotarod stimulation (right). \*\*\*\*p < 10<sup>-4</sup>, ANOVA followed by Tukey's multiple comparison test. n.s., not significant.
- See also Figure S5.

might be attributed to technical differences in the ChIP-seq efficiency of MEF2A and MEF2D antibodies, recent studies suggest that paralogs may exhibit differential DNA-binding specificities (Shen et al., 2018). Although the DNA-binding domains of MEF2A and MEF2D share >95% amino acid identity, the few non-consensus amino acids may contribute to differential binding (Potthoff and Olson, 2007). Sampling frequency and target site occupancy are also sensitive to the local concentrations of available TFs, as recently demonstrated for the cooperative TFs Sox2 and Oct4 in embryonic stem cells (Chen et al., 2014). Although MEF2 proteins are expressed at variable concentrations in neuronal cell types, these differences probably do not apply to granule neurons, which fortuitously co-express high levels of both MEF2A and MEF2D (Lyons et al., 1995). Although our analyses of mRNA levels of MEF2A and MEF2D by RNA sequencing of mouse cerebellum reveal similarly high levels of these two MEF2 proteins, MEF2D transcripts are more abundant, which may translate into a higher concentration of the MEF2D protein. The disparity between MEF2A and MEF2D occupancies may arise from their highly divergent transactivation domains. The crystal structure of a MEF2A homodimer demonstrates that the highly divergent region beyond the DNA-binding domain may interact with the genome, possibly conferring distinct binding activities to different MEF2 family members (Wu et al., 2010). Beyond its potential interaction with DNA, the transactivation domain of each MEF2 family member may undergo unique post-translational modifications or bind distinct co-factors that stabilize the binding of one paralog over the other (Shalizi et al., 2006; Shalizi and Bonni, 2005). In addition to co-factor interactions, MEF2A and MEF2D interact to form homodimers and heterodimers (Potthoff and Olson, 2007), which may further influence the distribution and activity of these two proteins across the genome. Perhaps, compensatory sites are more frequently bound by MEF2A/D heterodimers under baseline conditions in comparison to non-compensatory sites, which may predominantly bind MEF2D homodimers.

Importantly, true redundancy is defined as little or no change in output following perturbation of one factor because another one masks the effect (Macneil and Walhout, 2011; Conant and Wagner, 2004). Surprisingly, however, the molecular consequences of paralog occupancy have not yet been adequately explored. The integration of unbiased epigenome and transcriptome analyses in our study reveals that increased MEF2A occupancy upon the loss of MEF2D is functionally compensatory. These findings provide a tangible explanation for a common observation in which TF-binding sites detected by ChIP appear to be nonfunctional due to the unchanged mRNA levels of target genes, following depletion of the assayed TF (Li et al., 2008; Cao et al., 2010; Andzelm et al., 2015).

Although we have discovered the compensatory genomic features of MEF2A and MEF2D, we also find a large number of non-compensatory MEF2D-bound sites. Following gene duplication, TF paralogs are thought to maintain a degree of ancestral function while also gaining new specificities termed “neo-functionalization” (Badis et al., 2009; Macneil and Walhout, 2011). The identification of both compensatory and non-compensatory

MEF2 sites supports the occurrence of these dual evolutionary processes for MEF2A and MEF2D. Global analyses of paralog evolution suggest that non-compensatory sites arising from neo-functionalization of MEF2D may have emerged by the evolution of co-factor interactions. TF paralogs arising from local duplication events undergo rapid divergence of protein-protein interactions, with older paralogs acquiring relatively more protein interactions (Guan et al., 2007; Reece-Hoyes et al., 2013; Grove et al., 2009). As phylogenetic analysis indicates that MEF2D arose from an earlier local duplication event, it may have developed more co-factor interactions than MEF2A, thereby acquiring non-compensatory binding sites in granule neurons (Wu et al., 2011).

The chromatin environment plays a critical role in regulating the permissibility of TF binding (Spitz and Furlong, 2012). The concentration of MEF2A compensatory activity within more open chromatin suggests that chromatin accessibility may play a key role in directing the compensatory activity of paralogous TFs. Therefore, compensatory activity by MEF2A may be influenced by competition with nucleosomes at formerly bound MEF2D sites. Neuronal activity dynamically increases the accessibility at enhancers of stimulus-responsive genes (Su et al., 2017). State-dependent alterations in the chromatin environment may explain how motor activity increases MEF2A compensatory activity at formerly non-compensatory sites. Combinatorial TF occupancy serves as an energetically favorable mechanism to outcompete nucleosomes for a genomic binding site (Lambert et al., 2018; Grossman et al., 2017). We show that compensatory sites are differentially enriched for AP-1 motifs. Recent evidence reveals the importance of AP-1 for increasing chromatin accessibility by the recruitment of the BAF complex (Vierbuchen et al., 2017). Upon depletion of MEF2D, AP-1 may be sufficient to maintain adequate chromatin accessibility for incoming MEF2A. Collectively, these data suggest a model whereby collaborative TFs increase chromatin accessibility by recruitment of chromatin remodelers, thus allowing for compensatory regulation by multiple MEF2 family members.

Redundant mechanisms are thought to mediate the robustness for genes that are essential, such as ETS family co-occupancy at housekeeping genes and HOX factors at developmental patterning genes (Macneil and Walhout, 2011; Hollenhorst et al., 2007; Slattery et al., 2011). Because stimulus-responsive genes experience compensatory redundancy by MEF2A and MEF2D, this gene program may represent a shared feature of the MEF2 family. Interestingly, stimulus responsive genes are common targets of MEF2 family members in multiple cell types, including cardiac myocytes, T cells, fibroblasts, and neurons (Andzelm et al., 2015; Black and Olson, 1998). Furthermore, as stimulus-dependent gene expression links sensory experience to adaptive responses of the brain (West and Greenberg, 2011; Alberini and Kandel, 2014; Zovkic et al., 2014), the identification of compensatory regulation of motor-activity-induced gene expression may explain the redundancy of MEF2A and MEF2D in cerebellar-dependent learning.

Non-compensatory MEF2D sites may represent more specialized gene targets in granule neurons. Consistently, in

photoreceptors, MEF2D is recruited away from stimulus responsive genes to retinal-specific genes by cooperativity with CRX, a photoreceptor-specific TF (Andzelm et al., 2015). Thus, it will be interesting to determine whether MEF2D plays a more specialized biological role in granule neurons.

Although we have focused on compensatory functions for MEF2A and MEF2D as well as MEF2D-predominant roles in the regulation of transcriptional activation, MEF2 proteins also play critical roles in transcriptional repression, as revealed by studies of sumoylated MEF2 (Grégoire and Yang, 2005; Shalizi et al., 2006, 2007; Yamada et al., 2013). In addition, *in vivo* knockdown and structure-function studies in rat pups during the first two postnatal weeks suggest that sumoylated MEF2A drives the formation of postsynaptic dendritic claw differentiation and the maturation of presynaptic sites in the rat cerebellum (Shalizi et al., 2006; Yamada et al., 2013). The absence of major changes in transcriptomic analyses of the cerebellum in P22 AcKO mice raises the question of whether sumoylated MEF2A operates at a distinct developmental temporal window to repress transcription and trigger consequent developmental effects.

Due to the diverse states a neuron undergoes during development and plasticity, the context-dependent nature of compensation by TF family members should advance our understanding of brain development and function. As we learn more about the interdependency of paralogous TFs, we should gain further insight into how paralogs respond to TF loss-of-function mutations in the context of disease (Ebert and Greenberg, 2013; Südhof, 2017; Li et al., 2018). Furthermore, identifying the genomic signatures of non-compensatory sites may allow us to predict regulatory elements that might be more susceptible to gene dysregulation upon perturbation of different TF paralogs in disease states.

## STAR★METHODS

Detailed methods are provided in the online version of this paper and include the following:

- KEY RESOURCES TABLE
- LEAD CONTACT AND MATERIALS AVAILABILITY
- EXPERIMENTAL MODEL AND SUBJECT DETAILS
- METHOD DETAILS
  - Antibodies
  - Immunohistochemistry
  - Delay eye-blink conditioning
  - DigiGait analysis
  - Accelerating rotarod behavior assay
  - *In vivo* electroporation
  - Electron microscopy
  - qRT-PCR
  - RNA-sequencing
  - Chromatin immunoprecipitation
  - Rotarod activation paradigm
- QUANTIFICATION AND STATISTICAL ANALYSIS
  - Statistical Analysis
  - ChIP-seq alignment and peak calling
  - Motif Analysis

- RNA-seq analysis
- DNaseI-seq analysis
- DATA AND CODE AVAILABILITY

## SUPPLEMENTAL INFORMATION

Supplemental Information can be found online at <https://doi.org/10.1016/j.celrep.2019.10.033>.

## ACKNOWLEDGMENTS

We thank members of the Bonni, Greenberg, Gabel, Yang, and Yamada laboratories for helpful discussions and critical reading of the manuscript; and Matt Joens and Drs. Peter Bayguinov and James Fitzpatrick for electron microscopy (EM) studies and analyses at the Washington University Center for Cellular Imaging (WUCCI), which is supported by Washington University School of Medicine, Children's Discovery Institute of Washington University, St. Louis Children's Hospital (CDI-CORE-2015-505), and the Foundation for Barnes-Jewish Hospital (3770). We also thank Krikor Dikranian for insights in EM analyses and the Genome Technology Access Center (GTAC) and Center for Genomic Sciences (CGS) at Washington University in St. Louis for sequencing analyses. This work was supported by NIH grant NS041021 (A.B.), the Mathers Foundations (A.B.), and NIH grant R37 NS028829 (M.E.G.).

## AUTHOR CONTRIBUTIONS

S.P.M., N.C.R., and A.B. designed the study and wrote the manuscript. S.P.M. performed all experiments. N.C.R. and S.P.M. performed bioinformatics analyses. M.J.M. and H.C. assisted with qPCR and immunohistochemistry. T.Y. contributed to biochemical experiments. M.M.A., T.J.C., L.S.H., and M.E.G. provided mice and purified reagents.

## DECLARATION OF INTERESTS

The authors declare no conflicts of interest.

Received: June 20, 2019  
Revised: September 4, 2019  
Accepted: October 9, 2019  
Published: November 12, 2019

## REFERENCES

- Alberini, C.M., and Kandel, E.R. (2014). The regulation of transcription in memory consolidation. *Cold Spring Harb. Perspect. Biol.* 7, a021741.
- Amende, I., Kale, A., McCue, S., Glazier, S., Morgan, J.P., and Hampton, T.G. (2005). Gait dynamics in mouse models of Parkinson's disease and Huntington's disease. *J. Neuroeng. Rehabil.* 2, 20.
- Andzelm, M.M., Cherry, T.J., Harmin, D.A., Boeke, A.C., Lee, C., Hemberg, M., Pawlyk, B., Malik, A.N., Flavell, S.W., Sandberg, M.A., et al. (2015). MEF2D drives photoreceptor development through a genome-wide competition for tissue-specific enhancers. *Neuron* 86, 247–263.
- Andzelm, M.M., Vanness, D., Greenberg, M.E., and Linden, D.J. (2019). A Late Phase of Long-Term Synaptic Depression in Cerebellar Purkinje Cells Requires Activation of MEF2. *Cell Rep.* 26, 1089–1097.e3.
- Assali, A., Harrington, A.J., and Cowan, C.W. (2019). Emerging roles for MEF2 in brain development and mental disorders. *Curr. Opin. Neurobiol.* 59, 49–58.
- Ataman, B., Boulting, G.L., Harmin, D.A., Yang, M.G., Baker-Salisbury, M., Yap, E.L., Malik, A.N., Mei, K., Rubin, A.A., Spiegel, I., et al. (2016). Evolution of Osteocrin as an activity-regulated factor in the primate brain. *Nature* 539, 242–247.
- Badis, G., Berger, M.F., Philippakis, A.A., Talukder, S., Gehrke, A.R., Jaeger, S.A., Chan, E.T., Metzler, G., Vedenko, A., Chen, X., et al. (2009). Diversity and complexity in DNA recognition by transcription factors. *Science* 324, 1720–1723.

- Black, B.L., and Olson, E.N. (1998). Transcriptional control of muscle development by myocyte enhancer factor-2 (MEF2) proteins. *Annu. Rev. Cell Dev. Biol.* **14**, 167–196.
- Cao, Y., Yao, Z., Sarkar, D., Lawrence, M., Sanchez, G.J., Parker, M.H., MacQuarrie, K.L., Davison, J., Morgan, M.T., Ruzzo, W.L., et al. (2010). Genome-wide MyoD binding in skeletal muscle cells: a potential for broad cellular reprogramming. *Dev. Cell* **18**, 662–674.
- Chang, C.W., Wilkerson, J.R., Hale, C.F., Gibson, J.R., and Huber, K.M. (2017). Distinct stages of synapse elimination are induced by burst firing of CA1 neurons and differentially require MEF2A/D. *eLife* **6**, e26278.
- Chen, S.X., Cherry, A., Tari, P.K., Podgorski, K., Kwong, Y.K., and Haas, K. (2012). The transcription factor MEF2 directs developmental visually driven functional and structural metaplasticity. *Cell* **151**, 41–55.
- Chen, J., Zhang, Z., Li, L., Chen, B.C., Revyakin, A., Hajj, B., Legant, W., Dahan, M., Lionnet, T., Betzig, E., et al. (2014). Single-molecule dynamics of enhancosome assembly in embryonic stem cells. *Cell* **156**, 1274–1285.
- Chen, X., Chanda, A., Ikeuchi, Y., Zhang, X., Goodman, J.V., Reddy, N.C., Majidi, S.P., Wu, D.Y., Smith, S.E., Godec, A., et al. (2019). The Transcriptional Regulator SnoN Promotes the Proliferation of Cerebellar Granule Neuron Precursors in the Postnatal Mouse Brain. *J. Neurosci.* **39**, 44–62.
- Cholewa-Waclaw, J., Bird, A., von Schimmelmann, M., Schaefer, A., Yu, H., Song, H., Madabhushi, R., and Tsai, L.H. (2016). The Role of Epigenetic Mechanisms in the Regulation of Gene Expression in the Nervous System. *J. Neurosci.* **36**, 11427–11434.
- Conant, G.C., and Wagner, A. (2004). Duplicate genes and robustness to transient gene knock-downs in *Caenorhabditis elegans*. *Proc. Biol. Sci.* **271**, 89–96.
- de la Torre-Ubieta, L., and Bonni, A. (2011). Transcriptional regulation of neuronal polarity and morphogenesis in the mammalian brain. *Neuron* **72**, 22–40.
- Deerinck, T.J., Bushong, E.A., Lev-Ram, V., Shu, X., Tsien, R.Y., and Ellisman, M.H. (2010). Enhancing Serial Block-Face Scanning Electron Microscopy to Enable High Resolution 3-D Nanohistology of Cells and Tissues. *Microscopy and Microanalysis*, **16** (Cambridge University Press), pp. 1138–1139.
- Desjardins, C.A., and Naya, F.J. (2017). Antagonistic regulation of cell-cycle and differentiation gene programs in neonatal cardiomyocytes by homologous MEF2 transcription factors. *J. Biol. Chem.* **292**, 10613–10629.
- Ebert, D.H., and Greenberg, M.E. (2013). Activity-dependent neuronal signaling and autism spectrum disorder. *Nature* **493**, 327–337.
- Eferl, R., and Wagner, E.F. (2003). AP-1: a double-edged sword in tumorigenesis. *Nat. Rev. Cancer* **3**, 859–868.
- Estrella, N.L., Desjardins, C.A., Nocco, S.E., Clark, A.L., Maksimenko, Y., and Naya, F.J. (2015). MEF2 transcription factors regulate distinct gene programs in mammalian skeletal muscle differentiation. *J. Biol. Chem.* **290**, 1256–1268.
- Flavell, S.W., Cowan, C.W., Kim, T.K., Greer, P.L., Lin, Y., Paradis, S., Griffith, E.C., Hu, L.S., Chen, C., and Greenberg, M.E. (2006). Activity-dependent regulation of MEF2 transcription factors suppresses excitatory synapse number. *Science* **311**, 1008–1012.
- Flavell, S.W., Kim, T.K., Gray, J.M., Harmin, D.A., Hemberg, M., Hong, E.J., Markenscoff-Papadimitriou, E., Bear, D.M., and Greenberg, M.E. (2008). Genome-wide analysis of MEF2 transcriptional program reveals synaptic target genes and neuronal activity-dependent polyadenylation site selection. *Neuron* **60**, 1022–1038.
- Frank, C.L., Liu, F., Wijayatunge, R., Song, L., Biegler, M.T., Yang, M.G., Vockley, C.M., Safi, A., Gersbach, C.A., Crawford, G.E., and West, A.E. (2015). Regulation of chromatin accessibility and Zic binding at enhancers in the developing cerebellum. *Nat. Neurosci.* **18**, 647–656.
- Fünfschilling, U., and Reichardt, L.F. (2002). Cre-mediated recombination in rhombic lip derivatives. *Genesis* **33**, 160–169.
- Fuxman Bass, J.I., Sahni, N., Shrestha, S., Garcia-Gonzalez, A., Mori, A., Bhat, N., Yi, S., Hill, D.E., Vidal, M., and Walhout, A.J.M. (2015). Human gene-centered transcription factor networks for enhancers and disease variants. *Cell* **161**, 661–673.
- Gaudilliere, B., Shi, Y., and Bonni, A. (2002). RNA interference reveals a requirement for myocyte enhancer factor 2A in activity-dependent neuronal survival. *J. Biol. Chem.* **277**, 46442–46446.
- Grégoire, S., and Yang, X.J. (2005). Association with class IIa histone deacetylases upregulates the sumoylation of MEF2 transcription factors. *Mol. Cell Biol.* **25**, 2273–2287.
- Grossman, S.R., Engreitz, J., Ray, J.P., Nguyen, T.H., Hacohen, N., and Lander, E.S. (2018). Positional specificity of different transcription factor classes within enhancers. *Proc. Natl. Acad. Sci. U S A* **115**, E7222–E7230.
- Grove, C.A., De Masi, F., Barrasa, M.I., Newburger, D.E., Alkema, M.J., Bullyk, M.L., and Walhout, A.J. (2009). A multiparameter network reveals extensive divergence between *C. elegans* bHLH transcription factors. *Cell* **138**, 314–327.
- Guan, Y., Dunham, M.J., and Troyanskaya, O.G. (2007). Functional analysis of gene duplications in *Saccharomyces cerevisiae*. *Genetics* **175**, 933–943.
- Heiney, S.A., Wohl, M.P., Chettih, S.N., Ruffolo, L.I., and Medina, J.F. (2014). Cerebellar-dependent expression of motor learning during eyeblink conditioning in head-fixed mice. *J. Neurosci.* **34**, 14845–14853.
- Hollenhorst, P.C., Shah, A.A., Hopkins, C., and Graves, B.J. (2007). Genome-wide analyses reveal properties of redundant and specific promoter occupancy within the ETS gene family. *Genes Dev.* **21**, 1882–1894.
- Hurlock, E.C., Bose, M., Pierce, G., and Joho, R.H. (2009). Rescue of motor coordination by Purkinje cell-targeted restoration of Kv3.3 channels in *Kcnc3*-null mice requires *Kcnc1*. *J. Neurosci.* **29**, 15735–15744.
- Kawashima, T., Kitamura, K., Suzuki, K., Nonaka, M., Kamijo, S., Takemoto-Kimura, S., Kano, M., Okuno, H., Ohki, K., and Bito, H. (2013). Functional labeling of neurons and their projections using the synthetic activity-dependent promoter E-SARE. *Nat. Methods* **10**, 889–895.
- Kim, A.H., Puram, S.V., Bilimoria, P.M., Ikeuchi, Y., Keough, S., Wong, M., Rowitch, D., and Bonni, A. (2009). A centrosomal *Cdc20*-APC pathway controls dendrite morphogenesis in postmitotic neurons. *Cell* **136**, 322–336.
- Konishi, Y., Stegmüller, J., Matsuda, T., Bonni, S., and Bonni, A. (2004). *Cdh1*-APC controls axonal growth and patterning in the mammalian brain. *Science* **303**, 1026–1030.
- Lambert, S.A., Jolma, A., Campitelli, L.F., Das, P.K., Yin, Y., Albu, M., Chen, X., Taipale, J., Hughes, T.R., and Weirauch, M.T. (2018). The Human Transcription Factors. *Cell* **175**, 598–599.
- Levine, M., and Tjian, R. (2003). Transcription regulation and animal diversity. *Nature* **424**, 147–151.
- Li, X.Y., MacArthur, S., Bourgon, R., Nix, D., Pollard, D.A., Iyer, V.N., Hechmer, A., Simirenko, L., Stapleton, M., Luengo Hendriks, C.L., et al. (2008). Transcription factors bind thousands of active and inactive regions in the *Drosophila* blastoderm. *PLoS Biol.* **6**, e27.
- Li, M., Santpere, G., Imamura Kawasawa, Y., Evgrafov, O.V., Gulden, F.O., Pochareddy, S., Sunkin, S.M., Li, Z., Shin, Y., Zhu, Y., et al.; BrainSpan Consortium; PsychENCODE Consortium; PsychENCODE Developmental Subgroup (2018). Integrative functional genomic analysis of human brain development and neuropsychiatric risks. *Science* **362**, eaat7615.
- Lin, X., and Balleit, R.F. (1996). Cell intrinsic mechanisms regulate mouse cerebellar granule neuron differentiation. *Neurosci. Lett.* **220**, 81–84.
- Lipton, S.A., Li, H., Zaremba, J.D., McKecher, S.R., Cui, J., Kang, Y.J., Nie, Z., Soussou, W., Talantova, M., Okamoto, S., and Nakanishi, N. (2009). Autistic phenotype from MEF2C knockout cells. *Science* **323**, 208.
- Luna-Zurita, L., Stirnimann, C.U., Glatt, S., Kaynak, B.L., Thomas, S., Baudin, F., Samee, M.A., He, D., Small, E.M., Mileikovskiy, M., et al. (2016). Complex Interdependence Regulates Heterotypic Transcription Factor Distribution and Coordinates Cardiogenesis. *Cell* **164**, 999–1014.
- Lyons, G.E., Micales, B.K., Schwarz, J., Martin, J.F., and Olson, E.N. (1995). Expression of *mef2* genes in the mouse central nervous system suggests a role in neuronal maturation. *J. Neurosci.* **15**, 5727–5738.

- Lyons, M.R., Schwarz, C.M., and West, A.E. (2012). Members of the myocyte enhancer factor 2 transcription factor family differentially regulate *Bdnf* transcription in response to neuronal depolarization. *J. Neurosci.* *32*, 12780–12785.
- Macneil, L.T., and Walhout, A.J. (2011). Gene regulatory networks and the role of robustness and stochasticity in the control of gene expression. *Genome Res.* *21*, 645–657.
- Malik, A.N., Vierbuchen, T., Hemberg, M., Rubin, A.A., Ling, E., Couch, C.H., Stroud, H., Spiegel, I., Farh, K.K., Harmin, D.A., and Greenberg, M.E. (2014). Genome-wide identification and characterization of functional neuronal activity-dependent enhancers. *Nat. Neurosci.* *17*, 1330–1339.
- Matsuda, T., and Cepko, C.L. (2004). Electroporation and RNA interference in the rodent retina in vivo and in vitro. *Proc. Natl. Acad. Sci. USA* *101*, 16–22.
- Mazzoni, E.O., Mahony, S., Closser, M., Morrison, C.A., Nedelec, S., Williams, D.J., An, D., Gifford, D.K., and Wichterle, H. (2013). Synergistic binding of transcription factors to cell-specific enhancers programs motor neuron identity. *Nat. Neurosci.* *16*, 1219–1227.
- Mellén, M., Ayata, P., Dewell, S., Kriaucionis, S., and Heintz, N. (2012). MeCP2 binds to 5hmC enriched within active genes and accessible chromatin in the nervous system. *Cell* *151*, 1417–1430.
- Messina, D.N., Glasscock, J., Gish, W., and Lovett, M. (2004). An OR-Feome-based analysis of human transcription factor genes and the construction of a microarray to interrogate their expression. *Genome Res.* *14*, 2041–2047.
- Molyneaux, B.J., Arlotta, P., Menezes, J.R., and Macklis, J.D. (2007). Neuronal subtype specification in the cerebral cortex. *Nat. Rev. Neurosci.* *8*, 427–437.
- Porcelli, D., Fischer, B., Russell, S., and White, R. (2019). Chromatin accessibility plays a key role in selective targeting of Hox proteins. *Genome Biol.* *20*, 115.
- Porter, R.S., Jaamour, F., and Iwase, S. (2018). Neuron-specific alternative splicing of transcriptional machineries: Implications for neurodevelopmental disorders. *Mol. Cell. Neurosci.* *87*, 35–45.
- Potthoff, M.J., and Olson, E.N. (2007). MEF2: a central regulator of diverse developmental programs. *Development* *134*, 4131–4140.
- Pulimood, N.S., Rodrigues, W.D.S., Atkinson, D.A., Mooney, S.M., and Medina, A.E. (2017). The Role of CREB, SRF, and MEF2 in Activity-Dependent Neuronal Plasticity in the Visual Cortex. *J. Neurosci.* *37*, 6628–6637.
- Pulipparacharuvil, S., Renthall, W., Hale, C.F., Taniguchi, M., Xiao, G., Kumar, A., Russo, S.J., Sikder, D., Dewey, C.M., Davis, M.M., et al. (2008). Cocaine regulates MEF2 to control synaptic and behavioral plasticity. *Neuron* *59*, 621–633.
- Puram, S.V., Riccio, A., Koirala, S., Ikeuchi, Y., Kim, A.H., Corfas, G., and Bonni, A. (2011). A TRPC5-regulated calcium signaling pathway controls dendrite patterning in the mammalian brain. *Genes Dev.* *25*, 2659–2673.
- Rashid, A.J., Cole, C.J., and Josselyn, S.A. (2014). Emerging roles for MEF2 transcription factors in memory. *Genes Brain Behav.* *13*, 118–125.
- Reece-Hoyes, J.S., Pons, C., Diallo, A., Mori, A., Shrestha, S., Kadreppa, S., Nelson, J., Diprima, S., Dricot, A., Lajoie, B.R., et al. (2013). Extensive rewiring and complex evolutionary dynamics in a *C. elegans* multiparameter transcription factor network. *Mol. Cell* *51*, 116–127.
- Roussel, M.F., and Hatten, M.E. (2011). Cerebellum development and medulloblastoma. *Curr. Top. Dev. Biol.* *94*, 235–282.
- Saunders, A., Macosko, E.Z., Wysoker, A., Goldman, M., Krienen, F.M., de Rivera, H., Bien, E., Baum, M., Bortolin, L., Wang, S., et al. (2018). Molecular Diversity and Specializations among the Cells of the Adult Mouse Brain. *Cell* *174*, 1015–1030.e16.
- Shalizi, A.K., and Bonni, A. (2005). brawn for brains: the role of MEF2 proteins in the developing nervous system. *Curr. Top. Dev. Biol.* *69*, 239–266.
- Shalizi, A., Gaudillière, B., Yuan, Z., Stegmüller, J., Shirogane, T., Ge, Q., Tan, Y., Schulman, B., Harper, J.W., and Bonni, A. (2006). A calcium-regulated MEF2 sumoylation switch controls postsynaptic differentiation. *Science* *311*, 1012–1017.
- Shalizi, A., Bilimoria, P.M., Stegmüller, J., Gaudillière, B., Yang, Y., Shuai, K., and Bonni, A. (2007). PIASx is a MEF2 SUMO E3 ligase that promotes postsynaptic dendritic morphogenesis. *J. Neurosci.* *27*, 10037–10046.
- Sharma, N., Pollina, E.A., Nagy, M.A., Yap, E.L., Dibiase, F.A., Hrvatin, S., Hu, L., Lin, C., and Greenberg, M.E. (2019). ARNT2 Tunes Activity-Dependent Gene Expression through NCoR2-Mediated Repression and NPAS4-Mediated Activation. *Neuron* *102*, 390–406.e9.
- Shen, N., Zhao, J., Schipper, J.L., Zhang, Y., Bepler, T., Leehr, D., Bradley, J., Horton, J., Lapp, H., and Gordan, R. (2018). Divergence in DNA Specificity among Paralogous Transcription Factors Contributes to Their Differential In Vivo Binding. *Cell Syst.* *6*, 470–483.e8.
- Sheng, M., and Greenberg, M.E. (1990). The regulation and function of *c-fos* and other immediate early genes in the nervous system. *Neuron* *4*, 477–485.
- Slattery, M., Riley, T., Liu, P., Abe, N., Gomez-Alcala, P., Dror, I., Zhou, T., Rohs, R., Honig, B., Bussemaker, H.J., and Mann, R.S. (2011). Cofactor binding evokes latent differences in DNA binding specificity between Hox proteins. *Cell* *147*, 1270–1282.
- Spitz, F., and Furlong, E.E. (2012). Transcription factors: from enhancer binding to developmental control. *Nat. Rev. Genet.* *13*, 613–626.
- Su, Y., Shin, J., Zhong, C., Wang, S., Roychowdhury, P., Lim, J., Kim, D., Ming, G.L., and Song, H. (2017). Neuronal activity modifies the chromatin accessibility landscape in the adult brain. *Nat. Neurosci.* *20*, 476–483.
- Südhof, T.C. (2017). Molecular Neuroscience in the 21<sup>st</sup> Century: A Personal Perspective. *Neuron* *96*, 536–541.
- Teichmann, S.A., and Babu, M.M. (2004). Gene regulatory network growth by duplication. *Nat. Genet.* *36*, 492–496.
- Telese, F., Ma, Q., Perez, P.M., Notani, D., Oh, S., Li, W., Comoletti, D., Ohgi, K.A., Taylor, H., and Rosenfeld, M.G. (2015). LRP8-Reelin-Regulated Neuronal Enhancer Signature Underlying Learning and Memory Formation. *Neuron* *86*, 696–710.
- Valnegri, P., Huang, J., Yamada, T., Yang, Y., Mejia, L.A., Cho, H.Y., Oldenborg, A., and Bonni, A. (2017). RNF8/UBC13 ubiquitin signaling suppresses synapse formation in the mammalian brain. *Nat. Commun.* *8*, 1271.
- Vierbuchen, T., Ling, E., Cowley, C.J., Couch, C.H., Wang, X., Harmin, D.A., Roberts, C.W.M., and Greenberg, M.E. (2017). AP-1 Transcription Factors and the BAF Complex Mediate Signal-Dependent Enhancer Selection. *Mol. Cell* *68*, 1067–1082.e12.
- Wei, G.H., Badis, G., Berger, M.F., Kivioja, T., Palin, K., Enge, M., Bonke, M., Jolma, A., Varjosalo, M., Gehrke, A.R., et al. (2010). Genome-wide analysis of ETS-family DNA-binding in vitro and in vivo. *EMBO J.* *29*, 2147–2160.
- Weirauch, M.T., Yang, A., Albu, M., Cote, A.G., Montenegro-Montero, A., Drewe, P., Najafabadi, H.S., Lambert, S.A., Mann, I., Cook, K., et al. (2014). Determination and inference of eukaryotic transcription factor sequence specificity. *Cell* *158*, 1431–1443.
- West, A.E., and Greenberg, M.E. (2011). Neuronal activity-regulated gene transcription in synapse development and cognitive function. *Cold Spring Harb. Perspect. Biol.* *3*, a005744.
- Wu, Y., Dey, R., Han, A., Jayathilaka, N., Philips, M., Ye, J., and Chen, L. (2010). Structure of the MADS-box/MEF2 domain of MEF2A bound to DNA and its implication for myocardin recruitment. *J. Mol. Biol.* *397*, 520–533.
- Wu, W., de Folter, S., Shen, X., Zhang, W., and Tao, S. (2011). Vertebrate paralogous MEF2 genes: origin, conservation, and evolution. *PLoS One* *6*, e17334.
- Yamada, T., Yang, Y., Huang, J., Coppola, G., Geschwind, D.H., and Bonni, A. (2013). Sumoylated MEF2A coordinately eliminates orphan presynaptic sites and promotes maturation of presynaptic boutons. *J. Neurosci.* *33*, 4726–4740.

- Yamada, T., Yang, Y., Hemberg, M., Yoshida, T., Cho, H.Y., Murphy, J.P., Fioravante, D., Regehr, W.G., Gygi, S.P., Georgopoulos, K., and Bonni, A. (2014). Promoter decommissioning by the NuRD chromatin remodeling complex triggers synaptic connectivity in the mammalian brain. *Neuron* 83, 122–134.
- Yamada, T., Yang, Y., Valnegri, P., Juric, I., Abnoui, A., Markwalter, K.H., Guthrie, A.N., Godec, A., Oldenborg, A., Hu, M., et al. (2019). Sensory experience remodels genome architecture in neural circuit to drive motor learning. *Nature* 569, 708–713.
- Yang, Y., Kim, A.H., Yamada, T., Wu, B., Bilimoria, P.M., Ikeuchi, Y., de la Iglesia, N., Shen, J., and Bonni, A. (2009). A Cdc20-APC ubiquitin signaling pathway regulates presynaptic differentiation. *Science* 326, 575–578.
- Yang, Y., Yamada, T., Hill, K.K., Hemberg, M., Reddy, N.C., Cho, H.Y., Guthrie, A.N., Oldenborg, A., Heiney, S.A., Ohmae, S., et al. (2016). Chromatin remodeling inactivates activity genes and regulates neural coding. *Science* 353, 300–305.
- Yap, E.L., and Greenberg, M.E. (2018). Activity-Regulated Transcription: Bridging the Gap between Neural Activity and Behavior. *Neuron* 100, 330–348.
- Ziats, M.N., Grosvenor, L.P., and Rennert, O.M. (2015). Functional genomics of human brain development and implications for autism spectrum disorders. *Transl. Psychiatry* 5, e665.
- Zovkic, I.B., Paulukaitis, B.S., Day, J.J., Etkala, D.M., and Sweatt, J.D. (2014). Histone H2A.Z subunit exchange controls consolidation of recent and remote memory. *Nature* 515, 582–586.



## STAR★METHODS

### KEY RESOURCES TABLE

| REAGENT or RESOURCE                                                                   | SOURCE                                  | IDENTIFIER                                        |
|---------------------------------------------------------------------------------------|-----------------------------------------|---------------------------------------------------|
| <b>Antibodies</b>                                                                     |                                         |                                                   |
| Rabbit anti-Calbindin D-28K antibody                                                  | Millipore                               | Cat# AB1778; RRID: AB_2068336                     |
| Rabbit anti-MEF2A                                                                     | M.E. Greenberg lab                      | <a href="#">Andzelm et al., 2015</a>              |
| Rabbit anti-MEF2D                                                                     | M.E. Greenberg lab                      | <a href="#">Flavell et al., 2008</a>              |
| Rabbit anti-MEF2A                                                                     | Santa Cruz Biotechnology                | Cat# sc-313; RRID: AB_631920                      |
| Rabbit anti-MEF2C                                                                     | Proteintech                             | Cat# 18290-1-AP; RRID:AB_2142849                  |
| Mouse anti-14-3-3 (H-8) antibody                                                      | Santa Cruz Biotechnology                | Cat# sc-1657, RRID: AB_626618                     |
| Rabbit anti-Cre recombinase                                                           | Millipore                               | Cat# 69050-3; RRID: AB_10806983                   |
| Rabbit anti-H3K27ac                                                                   | Abcam                                   | Cat# ab4729; RRID:AB_2118291                      |
| Rabbit anti-Cleaved Caspase-3 (Asp175)                                                | Cell Signaling Technology               | Cat# 9661; RRID:AB_2341188                        |
| Chicken anti-GFP                                                                      | Abcam                                   | Cat# ab13970; RRID:AB_300798                      |
| <b>Chemicals, Peptides, and Recombinant Proteins</b>                                  |                                         |                                                   |
| Dynabeads Protein G                                                                   | Thermo Fisher                           | Cat#10003D                                        |
| Dynabeads Protein A                                                                   | Thermo Fisher                           | Cat#10001D                                        |
| AMPure XP beads                                                                       | Beckman Coulter                         | Cat# A63880                                       |
| Formaldehyde                                                                          | Sigma Aldrich                           | Cat# 252549                                       |
| Hoechst 33258 Solution                                                                | Sigma Aldrich                           | Cat# 94403                                        |
| <b>Critical Commercial Assays</b>                                                     |                                         |                                                   |
| Accel-NGS 2S Plus DNA Library Kit (24 rxns)                                           | Swift Biosciences                       | Cat#21024                                         |
| 2S Indexing Kit (12 indices, Set A)                                                   | Swift Biosciences                       | Cat#26148                                         |
| 2S Indexing Kit (12 indices, Set B)                                                   | Swift Biosciences                       | Cat#26248                                         |
| NEBNext Ultra Directional RNA Library Prep Kits                                       | New England Biolabs                     | Cat#E7760S                                        |
| NEBNext Multiplex Oligos for Illumina                                                 | New England Biolabs                     | Cat#E7335S                                        |
| NEBNext rRNA Depletion Kit                                                            | New England Biolabs                     | Cat#E6310L                                        |
| Qubit dsDNA HS Assay Kit                                                              | Thermo Fisher                           | Cat#Q32854                                        |
| <b>Deposited Data</b>                                                                 |                                         |                                                   |
| RNA-sequencing and anti-MEF2A, anti-MEF2D, and anti-H3K27ac ChIP-sequencing data      | This paper                              | GEO: GSE138028                                    |
| <b>Experimental Models: Organisms/Strains</b>                                         |                                         |                                                   |
| Mouse: Mef2d conditional knockout mice: Mef2d <sup>fl/fl</sup>                        | M.E. Greenberg lab                      | <a href="#">Andzelm et al., 2015</a>              |
| Mouse: Mef2a conditional knockout mice: Mef2a <sup>fl/fl</sup>                        | M.E. Greenberg lab                      | <a href="#">Andzelm et al., 2019</a>              |
| Mouse: G6R-Cre: GABA(A) $\alpha$ 6 receptor promoter driven Cre-recombinase transgene | L.F. Reichardt lab                      | <a href="#">Fünfschilling and Reichardt, 2002</a> |
| <b>Oligonucleotides</b>                                                               |                                         |                                                   |
| qPCR primers used in this study                                                       |                                         | <a href="#">Table S1</a>                          |
| <b>Recombinant DNA</b>                                                                |                                         |                                                   |
| pCAG-GFP                                                                              | <a href="#">Matsuda and Cepko, 2004</a> | RRID:Addgene_11150 (gift from Connie Cepko)       |
| <b>Software and Algorithms</b>                                                        |                                         |                                                   |
| GraphPad Prism 6                                                                      | Open Source                             | SCR_002798                                        |
| EdgeR                                                                                 | Open Source                             | SCR_012802                                        |
| GREAT                                                                                 | Open Source                             | SCR_005807                                        |
| Adobe Photoshop                                                                       | Software                                | SCR_014199                                        |
| Adobe Illustrator                                                                     | Software                                | SCR_010279                                        |
| Bowtie 2 (mm10)                                                                       | Open Source                             | SCR_005476                                        |

(Continued on next page)

**Continued**

| REAGENT or RESOURCE                           | SOURCE                              | IDENTIFIER     |
|-----------------------------------------------|-------------------------------------|----------------|
| Bedtools                                      | Open Source                         | SCR_006646     |
| MACS2                                         | Open Source                         | SCR_013291     |
| Galaxy                                        | Open Source                         | SCR_006281     |
| Imaris                                        | Software                            | SCR_007370     |
| MEME Suite                                    | Open Source                         | SCR_001783     |
| R                                             | Open Source                         | SCR_001905     |
| Other                                         |                                     |                |
| anti-MEF2 ChIP-seq in cortical neurons        | <a href="#">Telese et al., 2015</a> | GEO: GSE66710  |
| anti-H3K4me3 ChIP-seq in p22 mouse cerebellum | <a href="#">Yamada et al., 2014</a> | GEO: GSE57758  |
| Rotarod activation RNA-seq                    | <a href="#">Yamada et al., 2019</a> | GEO: GSE127995 |

**LEAD CONTACT AND MATERIALS AVAILABILITY**

Further information and requests for resources and reagents should be directed to and will be fulfilled by the Lead Contact, Azad Bonni ([bonni@wustl.edu](mailto:bonni@wustl.edu)). This study did not generate new unique reagents.

**EXPERIMENTAL MODEL AND SUBJECT DETAILS**

Mice were maintained in a pathogen-free environment. All procedures involving animals were performed according to protocols approved by the Animal Studies Committee of Washington University School of Medicine and in accordance with both the National Institute of Health Standings Committee on Animals as well as the National Institutes of Health guidelines. Mice used for behavioral experiments were housed individually in cages. MEF2A fl/fl, MEF2D fl/fl and GABA<sub>A</sub>(6)R-Cre have been described ([Andzelm et al., 2015, 2019](#); [Fünfschilling and Reichardt, 2002](#)). For all experiments, biological replicates are individual mice. For each experimental mouse, the control mouse is a sex-matched double floxed littermate without the G6R-Cre transgene. Experimental mice were not involved in previous procedures or multiple types of experiments. Administration of anesthesia for surgical operations on mice is described under [Method Details](#).

**METHOD DETAILS****Antibodies**

Antibodies to Calbindin (Millipore ab1778; IHC), Mef2a (Santa Cruz sc-313; ChIP/IP/IB), Mef2c (Protein-Tech 18290-1-AP; IB), 14-3-3 (Santa Cruz sc-1675; IB), Cre (Millipore 69050-3; IB), histone H3K27ac (Abcam ab4729; ChIP), cleaved caspase 3 (Cell Signaling Technology 9661S; IHC), GFP (Abcam ab13970; IHC) were purchased. Antibodies to Mef2a (IB) and Mef2d (ChIP/IP/IB) have been described ([Flavell et al., 2008](#); [Andzelm et al., 2015](#)).

**Immunohistochemistry**

The cerebellum from mice was fixed with 4% PFA and 4% sucrose and subjected to cryo-sectioning on the Leica CM3050S Cryostat. Sections were blocked with blocking buffer (10% goat serum, 3% BSA, and 0.4% Triton X in PBS). Subsequently, sections were incubated overnight with relevant primary antibodies followed by a two-hour incubation with Alexa Fluor conjugated secondary antibodies. The DNA dye Bisbenzimidazole (Hoechst 33258) was used to label cell nuclei. Confocal images were acquired with a Zeiss LSM 880 II Airyscan FAST Confocal Microscope or an Olympus FV1200 Confocal Microscope.

**Delay eye-blink conditioning**

Delay eye-blink conditioning assay was adapted from the procedure used by [Heiney et al. \(2014\)](#). Sex-matched littermate conditional MEF2A, MEF2D, MEF2A/D cKO or control mice at five to eight weeks of age were used. Surgical procedures were performed as described ([Yang et al., 2016](#)). Head plates were implanted and stabilized with screws using Metabond cement (Parkell) over the Bregma skull landmark in mice anesthetized with ketamine/xylazine (100mg/kg; 10mg/kg). After five days of post-surgical recovery, head-fixed mice underwent two consecutive days of one hour habituation sessions on a cylindrical treadmill. After training, mice underwent experimental testing in the head-fixed eyeblink conditioning apparatus. Mice gradually associate a conditioned stimulus (CS; blue LED) with an eye-blink-eliciting unconditioned stimulus (US, 20psi periocular air puff through a 25-gauge needle; CS-US

inter-stimulus interval, 150 msec). 100 trials of CS-US pairings were performed each day over six consecutive days. The learned eyelid conditioned response was recorded using a high-speed monochrome camera (Allied Vision). Fraction of eyelid closure, ranging from 0 (fully open) to 1 (fully closed), was calculated on each frame as described previously (Heiney et al., 2014). During the inter-stimulus period, eyelid closure > 0.1 was designated as a conditioned eyelid response (CR). Our measure for motor learning was the percentage of CR-positive trials on each session day (Percent CR). Investigators were blind to genotype during running of behavioral experiment and unblinded for analysis of results.

### DigiGait analysis

The DigiGait imaging platform (Mouse Specifics Inc, Quincy, MA, USA) was employed to assess gait dynamics in sex-matched littermate five-week-old conditional knockout and control mice as described (Valnegri et al., 2017; Puram et al., 2011; Amende et al., 2005). During mouse ambulation on a transparent treadmill (20 cm/s), digital paw prints were captured by high-speed camera. Subsequently, gait-related variables were quantified and analyzed by software specialized for the DigiGait imaging system. Investigators were blinded to genotype during running of behavioral experiment and unblinded for analysis of results.

### Accelerating rotarod behavior assay

The accelerating rotarod assay was performed using sex-matched littermate five-week-old MEF2A/D cKO and control mice. On the first day, mice underwent habituation on the rotarod apparatus (IITC) at a constant 5 rotations per minute (rpm) for 10 min. Following habituation, mice underwent three consecutive days of testing, with each session day consisting of 5 trials of forced ambulation at 5 to 40 rpm over a period of 3 minutes, with a 1 minute inter-trial interval (15 trials total). Latency to falling (sec) from the rod onto the platform below was recorded. Investigators were blinded to genotype during running of behavioral experiment and unblinded for analysis of results.

### In vivo electroporation

*In vivo* electroporation of postnatal mouse pups was performed as described (Yamada et al., 2014; Konishi et al., 2004; Kim et al., 2009; Yang et al., 2009; Chen et al., 2019). P12-P14 littermate conditional MEF2A/D knockout and control mouse pups were injected with pCAG-GFP (Matsuda and Cepko, 2004), and subjected to four electric pulses of 135mV with 950ms intervals. Electroporated pups were returned to moms and examined in a blinded manner by immunofluorescence confocal microscopy eight days later. Investigators were blinded to genotype during running of experiment and unblinded for analysis of results.

### Electron microscopy

P24-P28 mice were perfusion fixed with warmed (37°C) mammalian Ringer's solution for 2 minutes followed by a mixture of 2.5% glutaraldehyde and 2% paraformaldehyde in 0.15 M cacodylate buffer containing 2mM CaCl<sub>2</sub>, pH 7.4 for 5 minutes. Mouse brains were carefully dissected and placed into excess fixative overnight. The following day, 100 μm vibratome sections were taken of the cerebellum. Tissue slices were then stained according the methods described by Deerinck et al. (2010). In brief, coverslips were rinsed in cacodylate buffer 3 times for 10 minutes each, and subjected to a secondary fixation for one hour in 2% osmium tetroxide/1.5% potassium ferrocyanide in cacodylate buffer for one hour, rinsed in ultrapure water 3 times for 10 minutes each, and stained in an aqueous solution of 1% thiocarbohydrazide for one hour. After this, the coverslips were once again stained in aqueous 2% osmium tetroxide for one hour, rinsed in ultrapure water 3 times for 10 minutes each, and stained overnight in 1% uranyl acetate at 4°C. The samples were then again washed in ultrapure water 3 times for 10 minutes each and *en bloc* stained for 30 minutes with 20 mM lead aspartate at 60°C. After staining was complete, coverslips were briefly washed in ultrapure water, dehydrated in a graded acetone series (50%, 70%, 90%, 100% x2) for 10 minutes in each step, and infiltrated with microwave assistance (Pelco BioWave Pro, Redding, CA) into Durcupan resin, and flat embedded between two slides that had previously been coated with PTFE release agent (Miller-Stephenson #MS-143XD, Danbury, CT) and clamped with binder clips. Samples were cured in an oven at 60°C for 48 hours. Post resin curing, the slides were separated and regions containing central vermal lobules of the cerebellum were cut out by saw and mounted onto blank resin stubs before 70 nm thick sections were cut and placed onto silicon wafer chips. These chips were then adhered to SEM pins with carbon adhesive tabs and large areas (~200 × 200 μm) were then imaged at high resolution in a FE-SEM (Zeiss Merlin, Oberkochen, Germany) using the ATLAS (Fibics, Ottawa, Canada) scan engine to tile large regions of interest. High-resolution tiles were captured at 20,480 × 20,480 pixels at 10 nm/pixel with a 8 μs dwell time and line average of 2. The SEM was operated at 8 KeV and 900 pA using the solid-state backscatter detector. Tiles were aligned and exported using ATLAS 5. Investigators were blinded to genotype during running of experiment and synapse quantification, then unblinded for analysis of results.

### qRT-PCR

Reverse transcription reactions were performed with Superscript III (Invitrogen) according to manufacturer's protocol. Real-time PCR reactions using iTaq Universal SYBR Green Supermix (BioRad) were performed on the LightCycler 480 II (Roche).

### RNA-sequencing

For RNA-seq, total RNA was extracted from the cerebellum of sex-matched littermate mice using Trizol (ThermoFisher) according to the manufacturer's instructions. RNA was reverse-transcribed with oligo-dT priming and the cDNA was sequenced on an Illumina

HiSeq 2500 (Genome Technology Access Center at Washington University). Four biological replicates were sequenced in all experiments.

### Chromatin immunoprecipitation

ChIP-seq assays were performed with P22 mouse cerebella as described with modifications (Andzelm et al., 2015). For MEF2A and MEF2D ChIP-seq, prior to immunoprecipitation, the respective antibody was coupled with Dynabeads protein A (ThermoFisher). For histone H3K27ac ChIP-seq, prior to immunoprecipitation, the antibody was coupled to Dynabeads protein G (ThermoFisher). Following immunoprecipitation, MEF2 ChIP library prep and sequencing was performed at the Genome Technology Access Center at Washington University as described (Yang et al., 2016). H3K27ac ChIP libraries were prepared with Accel-NGS 2S Plus DNA Library Kit (Swift Biosciences) and sequenced on the Illumina NextSeq 500 platform at the Center for Genomic Sciences (Washington University in St. Louis School of Medicine). Three to four biological ChIP replicates were sequenced in all experiments.

### Rotarod activation paradigm

Five- to eight-week-old sex-matched littermate AcKO, DcKO, ADcKO and control mice were trained on an accelerating rotarod on the first day for 30 min (6 trials for each of the following speeds: 5-10rpm, 5-15rpm, 5-20rpm; trial duration: 90 s; inter-trial interval: 10 s; ramp speed: 90 s). On the second day, mice were placed on the rotarod for 1 hour (36 trials of 5-20rpm; trial duration: 90 s; inter-trial interval 10 s; ramp speed: 90 s), immediately followed by extraction of total RNA from cerebellum using Trizol (Thermo Fisher Scientific) according to the manufacturer's instructions. ~100 ng of RNA was treated with NEBNext rRNA Depletion Kit and libraries prepared with NEBNext Ultra II Directional RNA Library Prep Kit for Illumina (New England Biolabs) and sequenced on the Illumina NextSeq 500 platform at the Center for Genomic Sciences (Washington University in St. Louis School of Medicine) to obtain 75bp single-end reads. Four biological replicates were performed in all experiments. Investigators were blinded to genotype during running of behavioral experiment and unblinded for analysis of results.

## QUANTIFICATION AND STATISTICAL ANALYSIS

### Statistical Analysis

Statistical analysis for each experiment is detailed in the figure legends. For analysis of genomic distribution, the distribution of enhancers and promoters bound by MEF2A and MEF2D were compared to the genomic distribution of all enhancers and promoters. Statistical significance was evaluated using a two-tailed Chi-square test. Box-whisker plots display median value with whiskers representing the 5<sup>th</sup> and 95<sup>th</sup> percentile. Significance testing for box-whisker plots were performed using two-tailed unpaired t test or ANOVA with Tukey multiple comparison test, when appropriate. MEF2-bound genes were defined as the single nearest gene based on distance to a MEF2 ChIP-seq peak. Significance for overlap of RNA-seq clusters with MEF2A and MEF2D peaks identified in various ChIP-seq conditions was evaluated by hypergeometric test followed by Bonferroni multiple comparison. For behavioral experiments, independent t test and repeated-measures ANOVA followed by Sidak's multiple comparison correction were used when appropriate. Threshold for calling statistical significance for all analyses mentioned above was  $p < 0.05$ . Statistical analyses were performed using Graphpad PRISM 6.0.

### ChIP-seq alignment and peak calling

Single-end reads of 50 or 75 base pairs were obtained for all datasets. Samples were sequenced to a minimum depth of 18.5 million reads and aligned to the mm10 genome using Bowtie2 with default parameters for Galaxy platform. Reads were then filtered for a map quality score greater than 10 (mapQuality > 10). Peaks were called using MACS2 on pooled data. Blacklist regions were subsequently removed prior to downstream analysis and visualization of ChIP-seq data.

### Motif Analysis

MEME suite was used to perform *de novo* motif discovery for MEF2A and MEF2D peaks, with similarly sized flanking regions of MEF2A and MEF2D peaks serving as genomic background. MRE degeneracy was determined by scanning MEF2A and MEF2D peaks for a consensus MRE using FIMO software. Identification of motifs relatively enriched in compensatory sites compared to non-compensatory sites was performed using AME software, in which compensatory sites served as the experimental dataset and non-compensatory sites as the control dataset.

### RNA-seq analysis

Differential mRNA-seq analysis was performed for RNA extracted from the cerebellum of P22 AcKO, DcKO, ADcKO, and control mice. Reduction of potential line-specific differences between conditional knockout lines was performed by overlapping genes identified by two types of differential mRNA analyses, one in which conditional knockout mice were compared to respective control littermates and another in which they were compared to controls from all conditional lines.

### **DNaseI-seq analysis**

DNaseI-seq peaks were called using MACS2 at a q-value of less than 0.01 ( $-q$  0.01) without model building ( $-nomodel$ ), an extension of 200bp ( $-extsize$  200), and a shift of  $-100$ bp ( $-shift$   $-100$ ). DNaseI-hypersensitivity performed in two biological replicates of cerebellum harvested from p22 mouse in [Yamada et al., \(2019\)](#).

### **DATA AND CODE AVAILABILITY**

The accession number for the RNA-sequencing, anti-MEF2A, anti-MEF2D, and anti-H3K27ac ChIP-sequencing datasets reported in this paper is GEO repository: GSE138028

**Cell Reports, Volume 29**

## **Supplemental Information**

### **Chromatin Environment and Cellular Context Specify Compensatory Activity of Paralogous MEF2 Transcription Factors**

**Shahriyar P. Majidi, Naveen C. Reddy, Michael J. Moore, Hao Chen, Tomoko Yamada, Milena M. Andzelm, Timothy J. Cherry, Linda S. Hu, Michael E. Greenberg, and Azad Bonni**

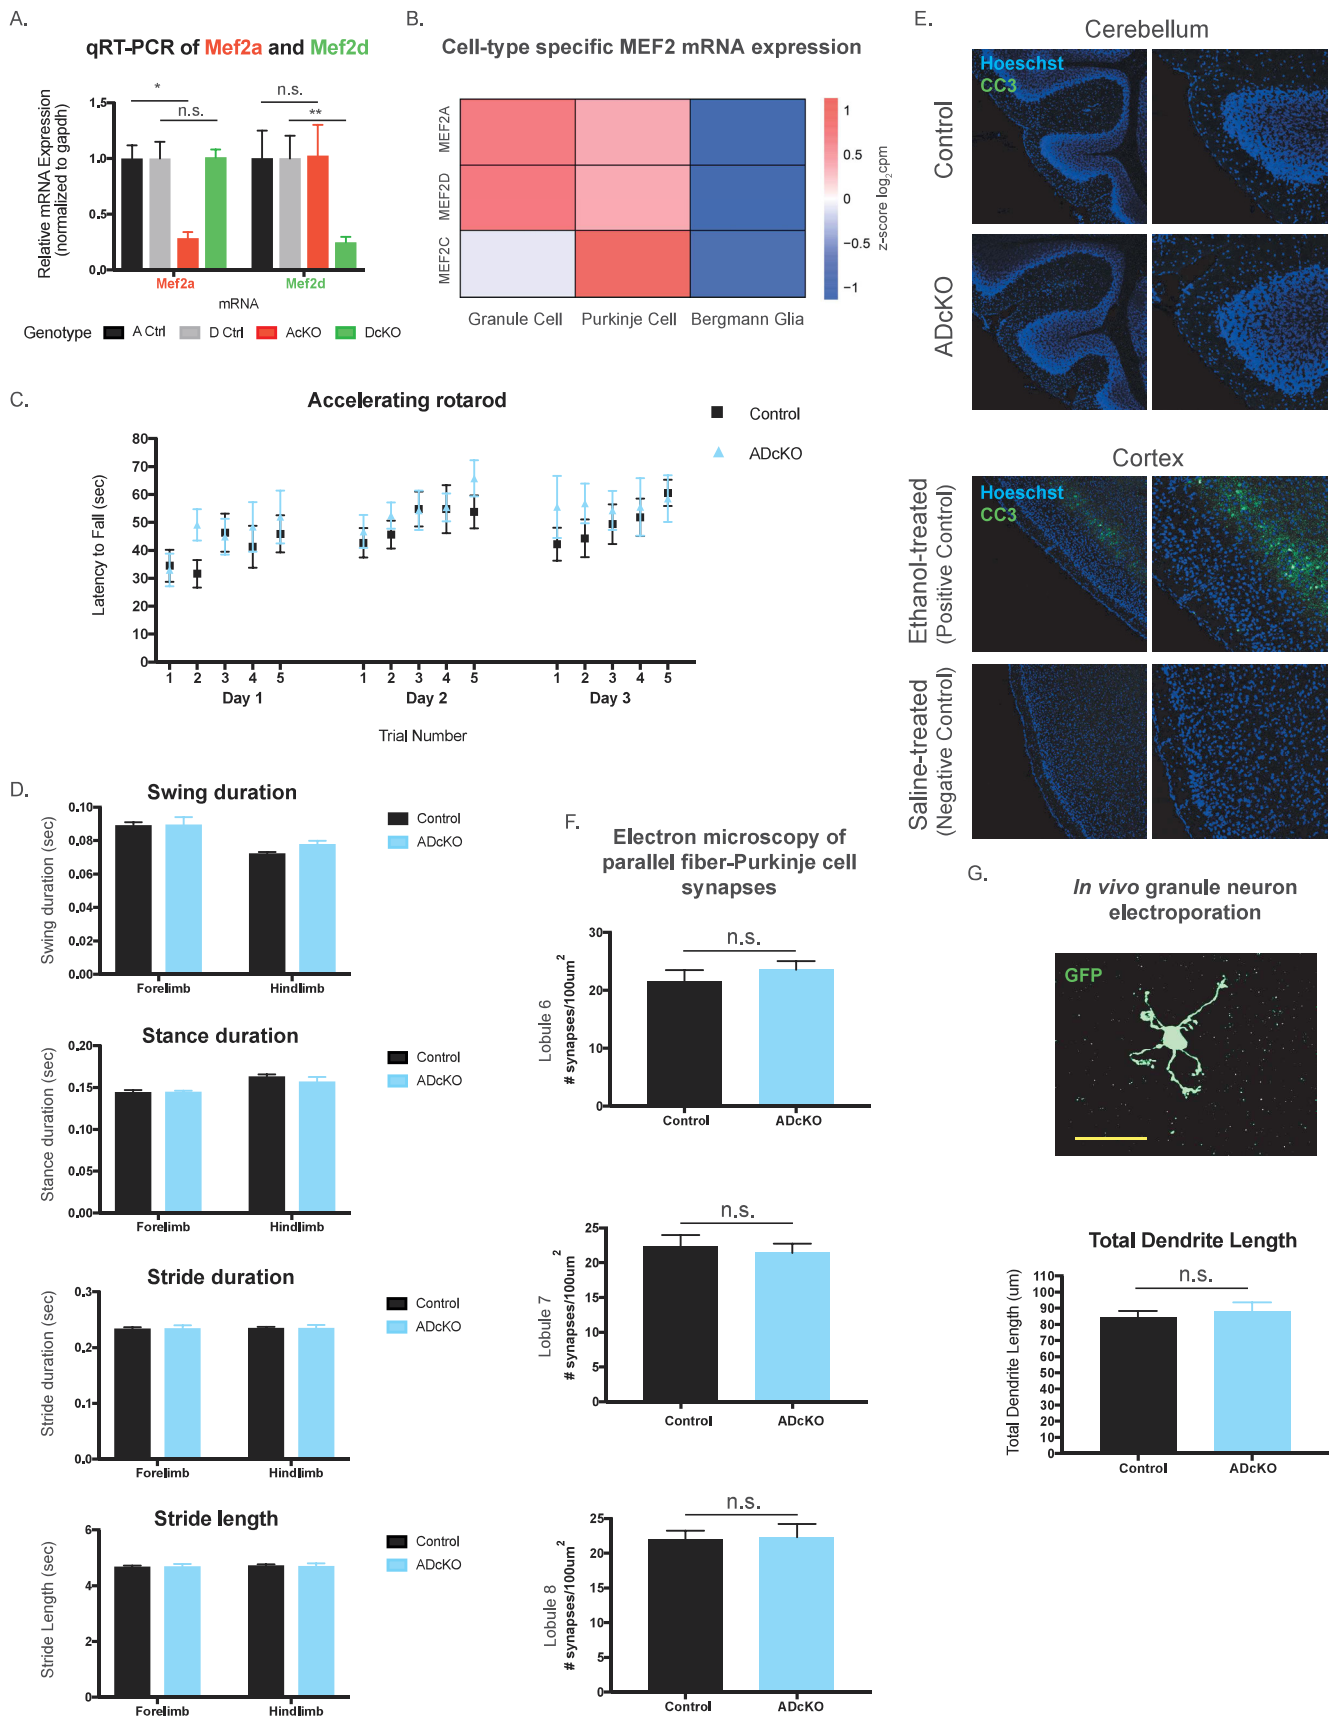

**Figure S1. (Related to Fig. 1): Characterization of neuronal development and behavior in ADcKO mice.**

A. qRT-PCR of *Mef2a* and *Mef2d* in AcKO, DcKO, and respective control P22 mouse cerebellum. For each mRNA species, each cKO condition is normalized to *Gapdh* and its respective control.

B. Analysis of cell type-specific *Mef2* mRNA expression obtained from TRAP-seq (Mellen et al., 2012) on granule cells, Purkinje cells, and Bergmann glia from the cerebellar cortex. Heat represents z-score of  $\log_2$  cpm.

- C. Accelerating rotarod of ADcKO (n= 9) and respective control (n=10) mice performed over three consecutive days for five trials each. Latency to fall in seconds was recorded.
- D. Analysis of gait dynamics by Digigait Assay did not reveal deficits in sex-matched ADcKO (n=4) relative to control (n=5) littermates on stride-related variables for both the forelimbs and hindlimbs. Two-way ANOVA with Sidak's multiple comparison test.
- E. Representative images of immunohistochemical analyses performed with antibodies for cleaved caspase 3 (CC3) and the DNA dye Bisbenzimidazole (Hoechst) in the cerebellar cortex from control and ADcKO sex-matched littermates. Because few cerebellar cells are normally CC3-positive, for positive control we induced apoptosis in the mouse frontal cortex using two consecutive subcutaneous injections, two hours apart, of 20% ethanol 2.5g/kg into P7 mice and saline as negative control. Magnification 10X (left) and 20X (right).
- F. Electron Microscopy analysis of synapses between cerebellar granule neuron parallel fibers with Purkinje cell dendritic spines in the cerebellar cortex of ADcKO (n=5 mice) and control (n=6 mice) sex-matched littermates.
- G. In vivo electroporation of GFP expression plasmid into the cerebellar cortex of ADcKO (n=4) and control (5) sex-matched littermate mice labels developing granule neurons. Eight days post-electroporation, immunohistochemical analyses were performed using a GFP antibody (top). Number (No.) of primary dendrites (middle) and dendrite length (bottom) analyzed in GFP-positive granule neurons.
- \*  $p < 10^{-1}$ , Mann Whitney test. n.s., not significant.



A.

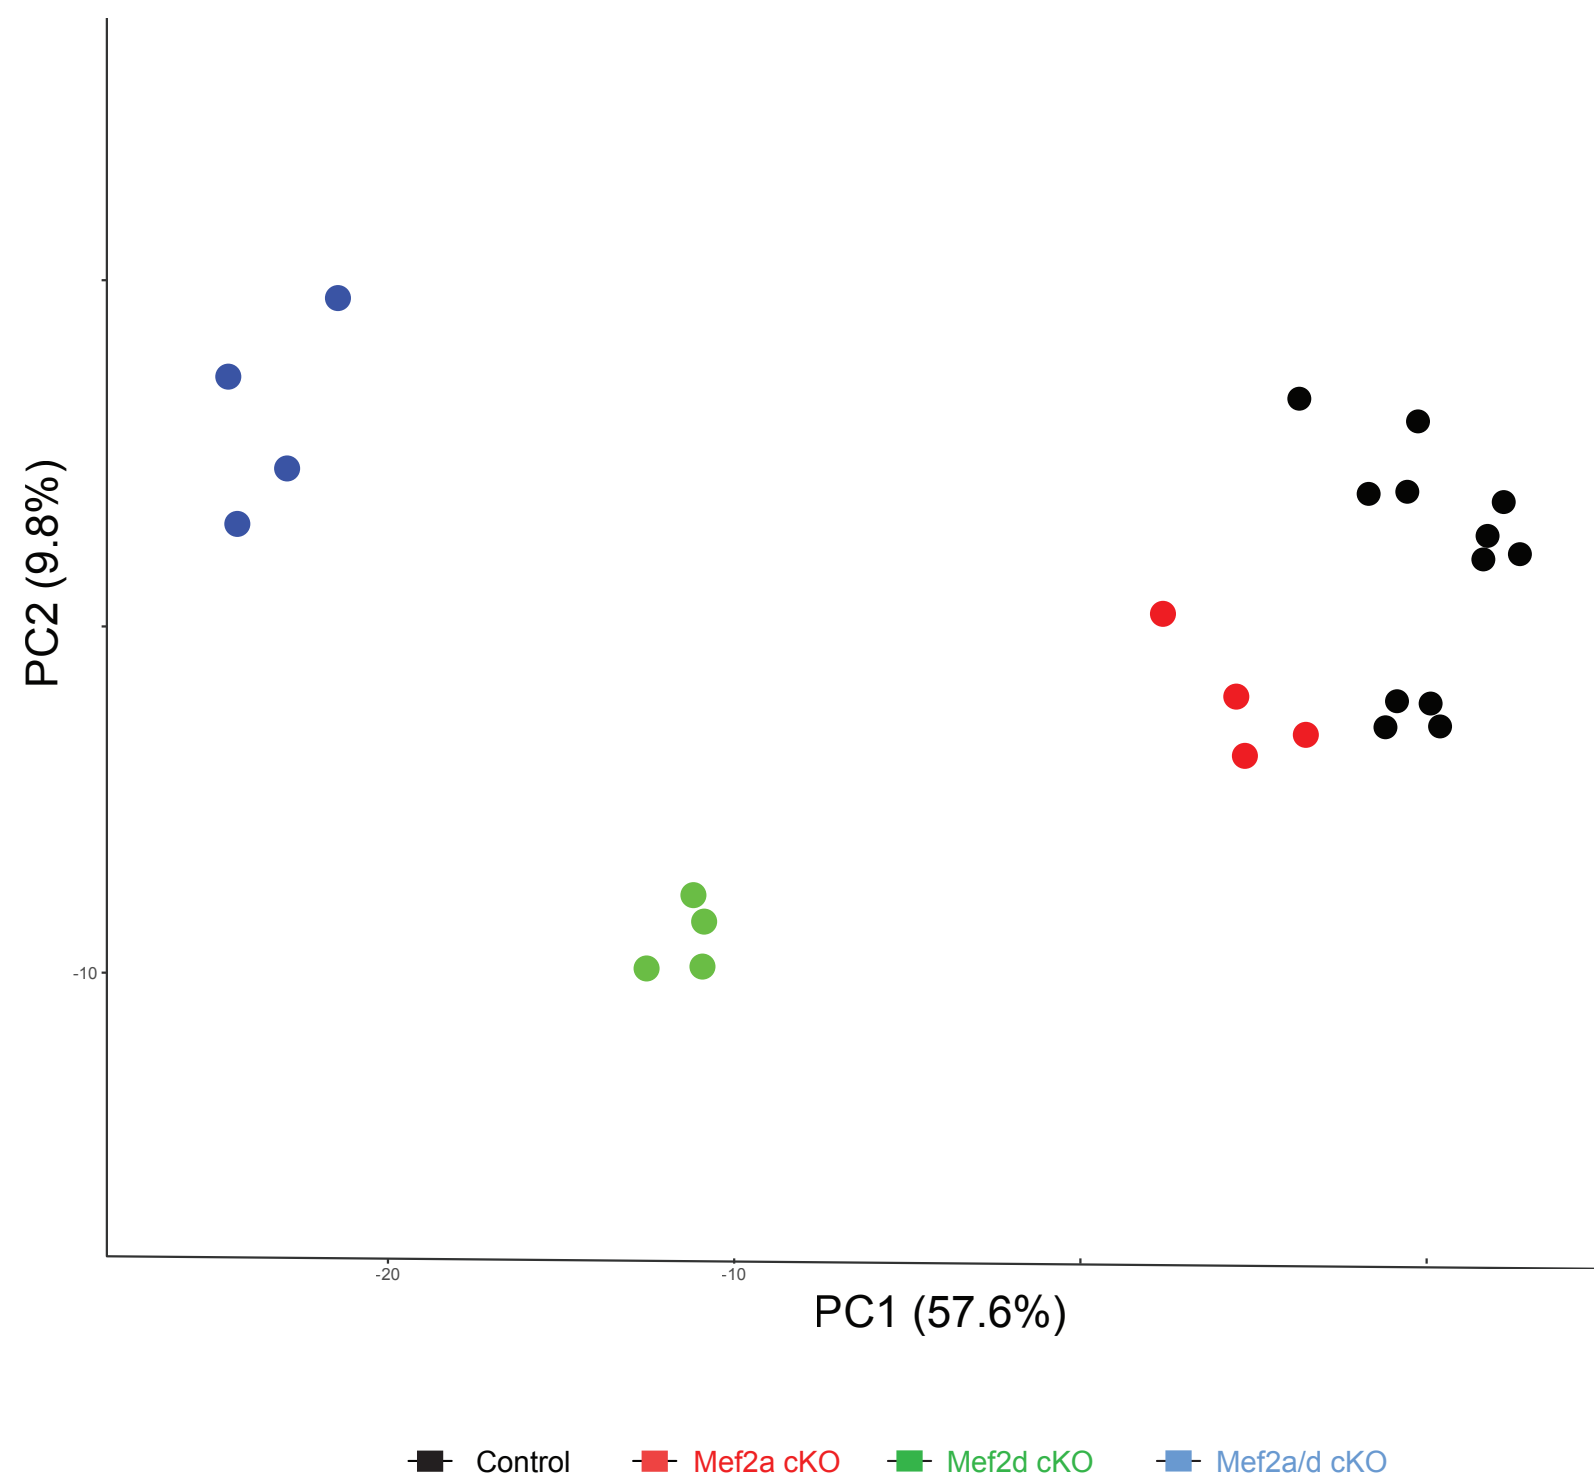

B.

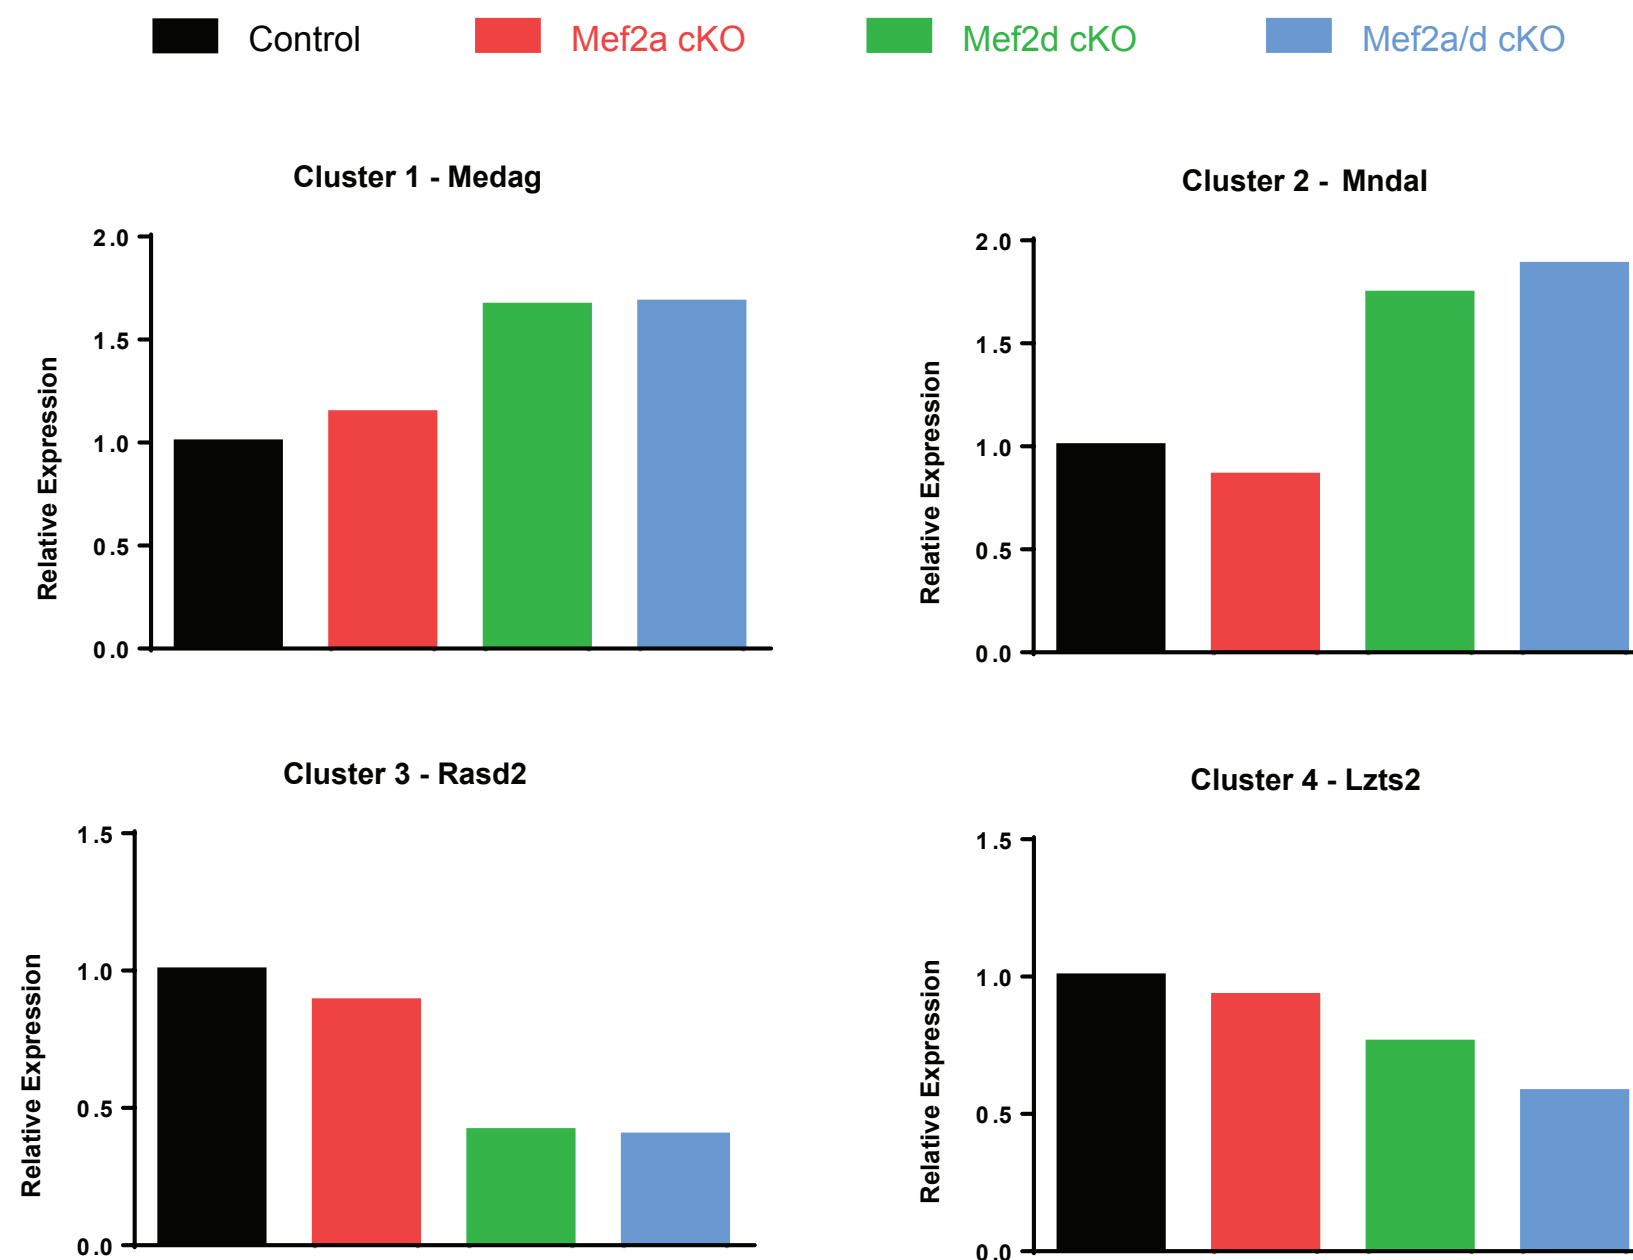

**Figure S2. (Related to Fig. 2): The majority of variation between RNA-seq conditions is contributed by the three MEF2 cKO conditions.**

A. Principal component (PC) analysis of RNA-seq samples, including four replicates each of AcKO (red), DcKO (green), ADcKO (blue), and respective sex-match littermate control mice (black).

B. Relative expression of select genes in control (black), AcKO (red), DcKO (green), and ADcKO (blue). Values are plotted as counts per million (CPM) normalized to respective controls. This quantitation of the genes from the tracks in Figure 2C reveals a stronger effect of ADcKO relative to DcKO on gene expression in Clusters 2 and 4. By contrast, there are relatively minimal differences in gene expression levels between ADcKO and DcKO in Clusters 1 and 3.

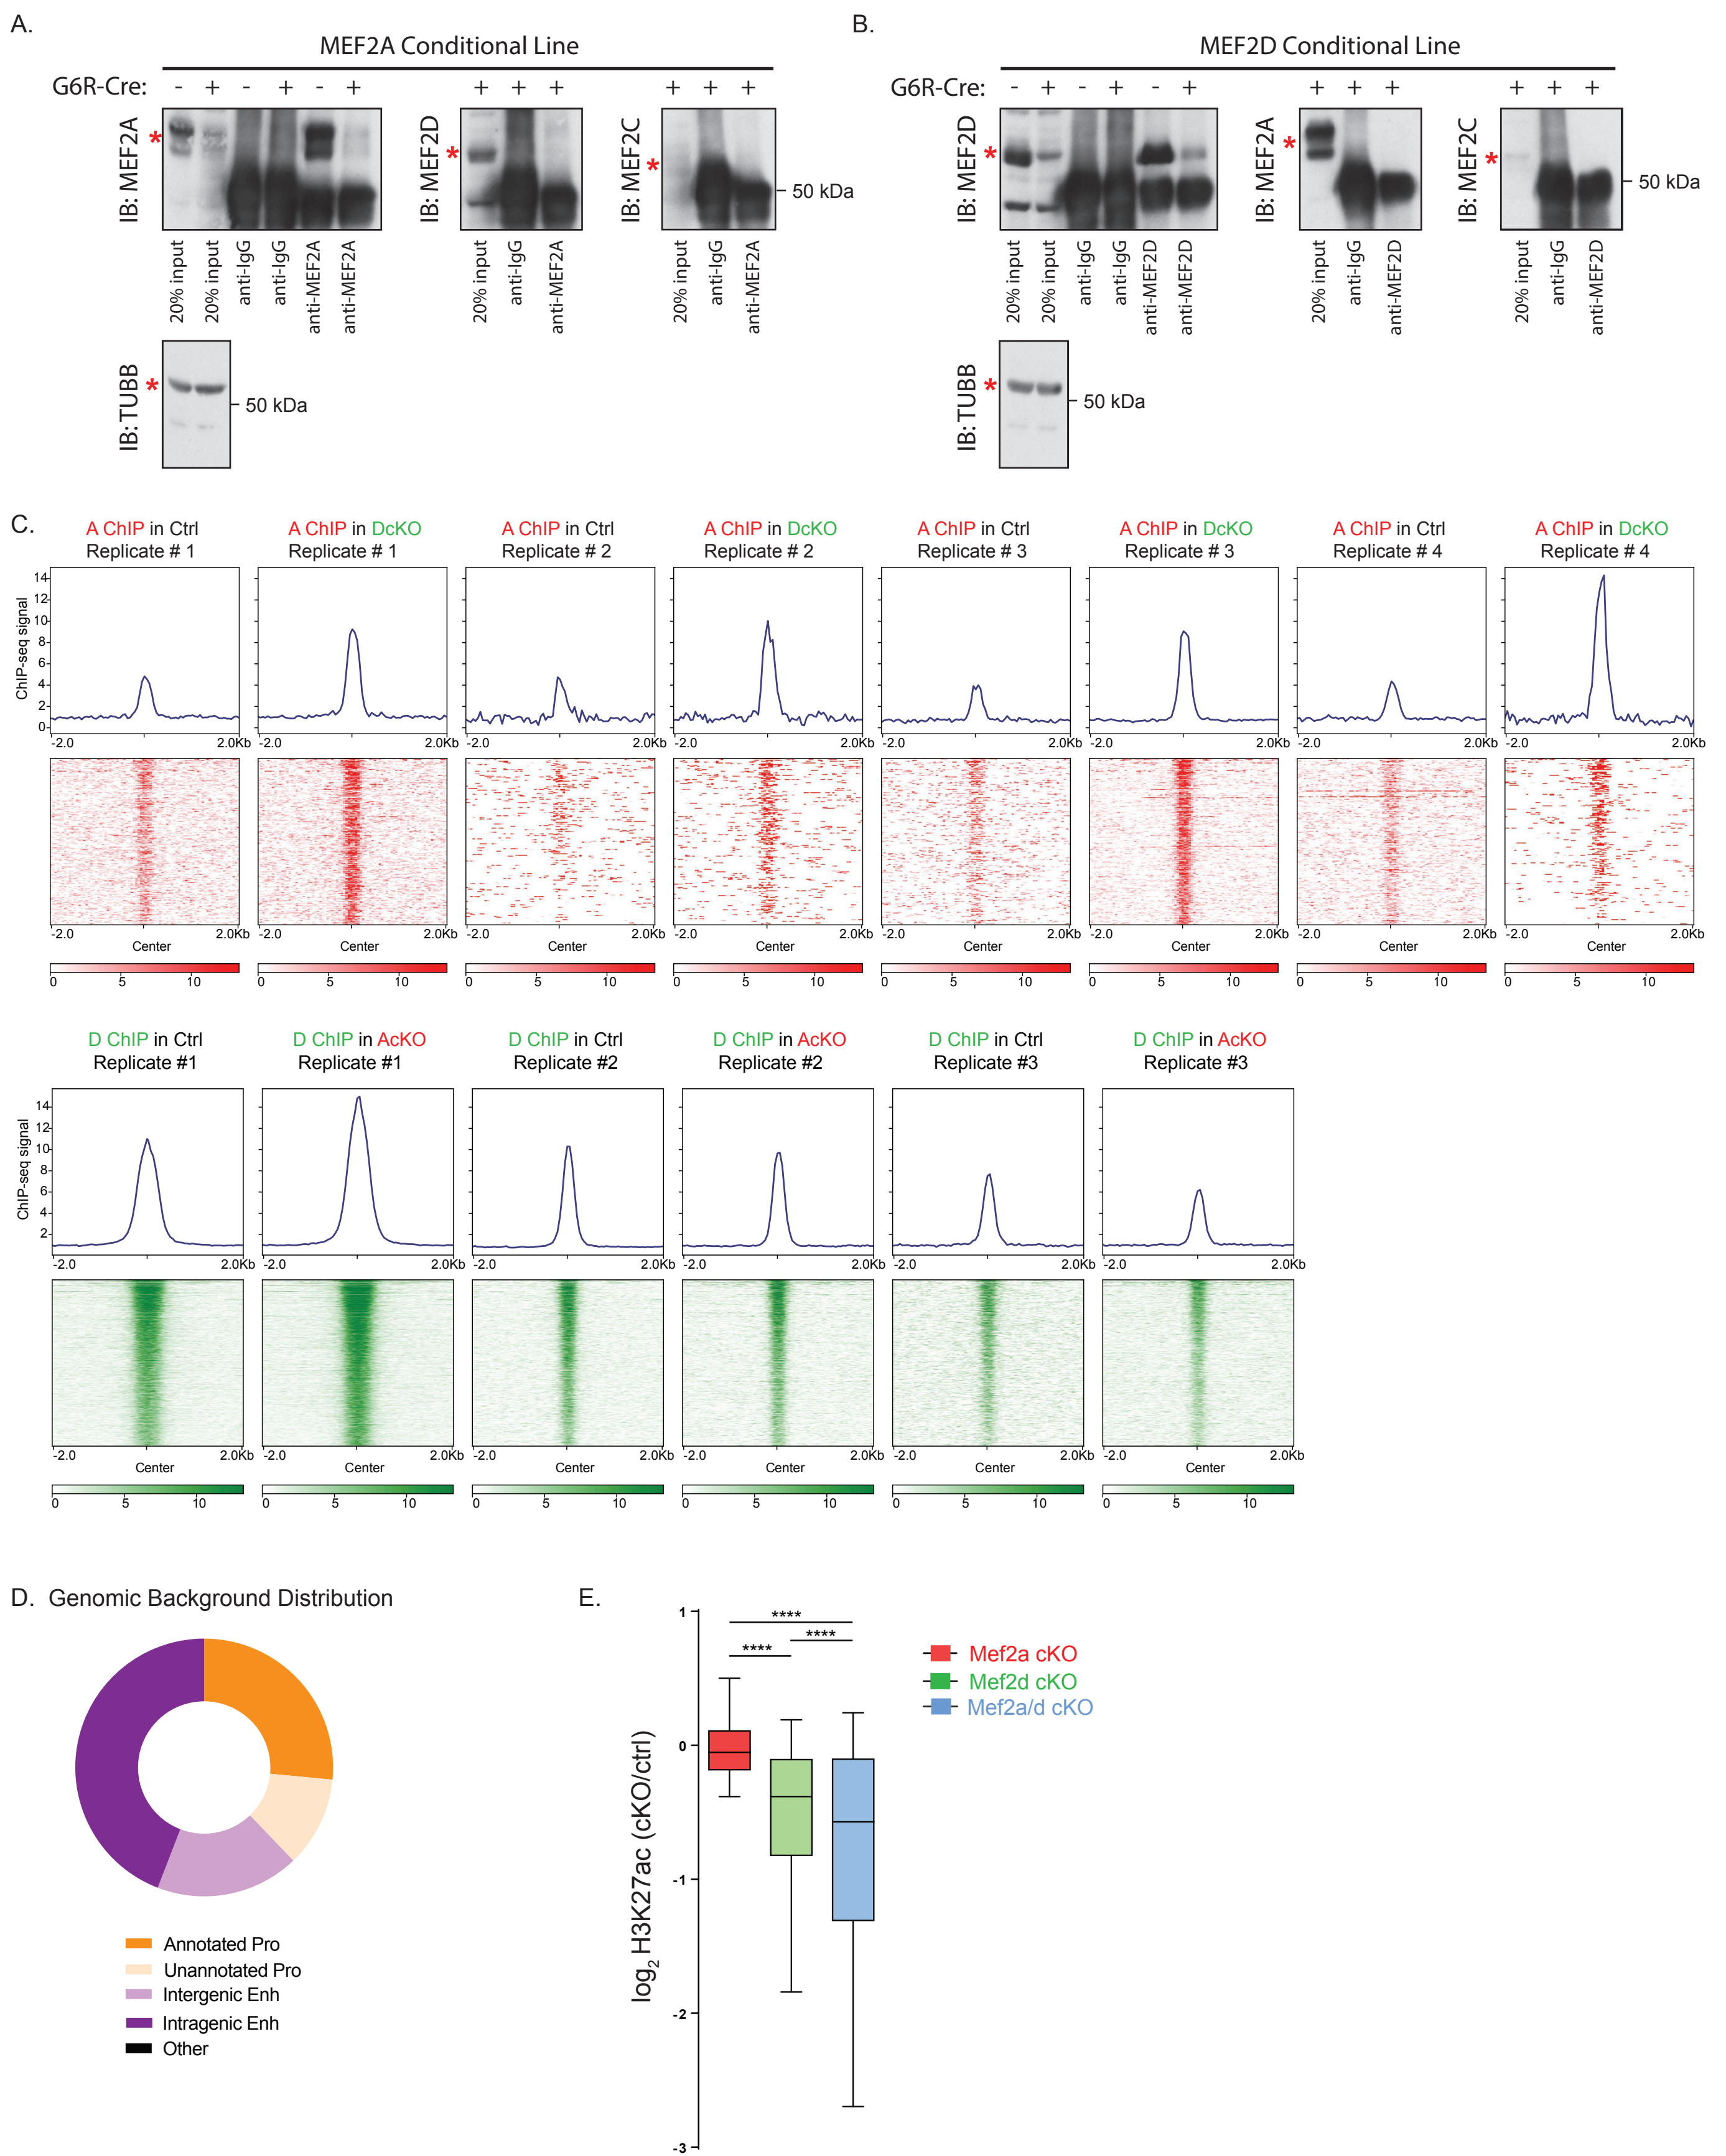

**Figure S3. (Related to Fig. 3): Increase of MEF2A occupancy in DcKO mice is consistent across each pair of biological replicates.**  
 A. Immunoprecipitation of MEF2A from MEF2A conditional mouse cerebellar protein lysate performed with same MEF2A antibody used for ChIP-sequencing experiments is followed by immunoblotting (IB) for the three proteins expressed in postnatal day 22 (P22) mouse cerebellum: MEF2A, MEF2C, and MEF2D. Although the MEF2A ChIP antibody strongly immunoprecipitates MEF2A (left panel), it does not immunoprecipitate MEF2D (middle panel) or MEF2C (right panel) in AcKO mouse cerebellum. Beta-tubulin (TUBB) is the loading control. (+) indicates presence of G6R-Cre transgene; (-) indicates lack of G6R-Cre transgene.

B. Immunoprecipitation of MEF2D from MEF2D conditional mouse cerebellar protein lysate performed with the same MEF2D antibody used for ChIP-sequencing experiments is followed by immunoblotting (IB) for the three proteins expressed in postnatal day 22 (P22) mouse cerebellum: MEF2A, MEF2C, and MEF2D. Although the MEF2D ChIP antibody strongly immunoprecipitates MEF2D (left panel), it does not immunoprecipitate MEF2A (middle panel) or MEF2C (right panel) in DcKO mouse cerebellum. Beta-tubulin (TUBB) is the loading control.

C. Aggregate plot and heatmap of ChIP-seq signal for four pairs of biological replicates for MEF2A in control (Ctrl) and DcKO (red, top) and MEF2D in control (Ctrl) and AcKO (green, bottom) P22 mouse cerebellum.

D. Pie charts displaying regulatory element distribution for genomic background in P22 mouse cerebellum.

Pro = promoter; Enh = enhancer.

E. For non-compensatory genomic-binding sites: box-whisker plots of log<sub>2</sub> transformed fold-change of H3K27ac in AcKO, DcKO, and ADcKO over respective controls. Horizontal line inside box represents the median. Whiskers represent the 5th and 95th percentile; \*\*\*\* p<10<sup>-4</sup>, ANOVA followed by Tukey's multiple comparison test.

A. MEF2 sites at C3 genes

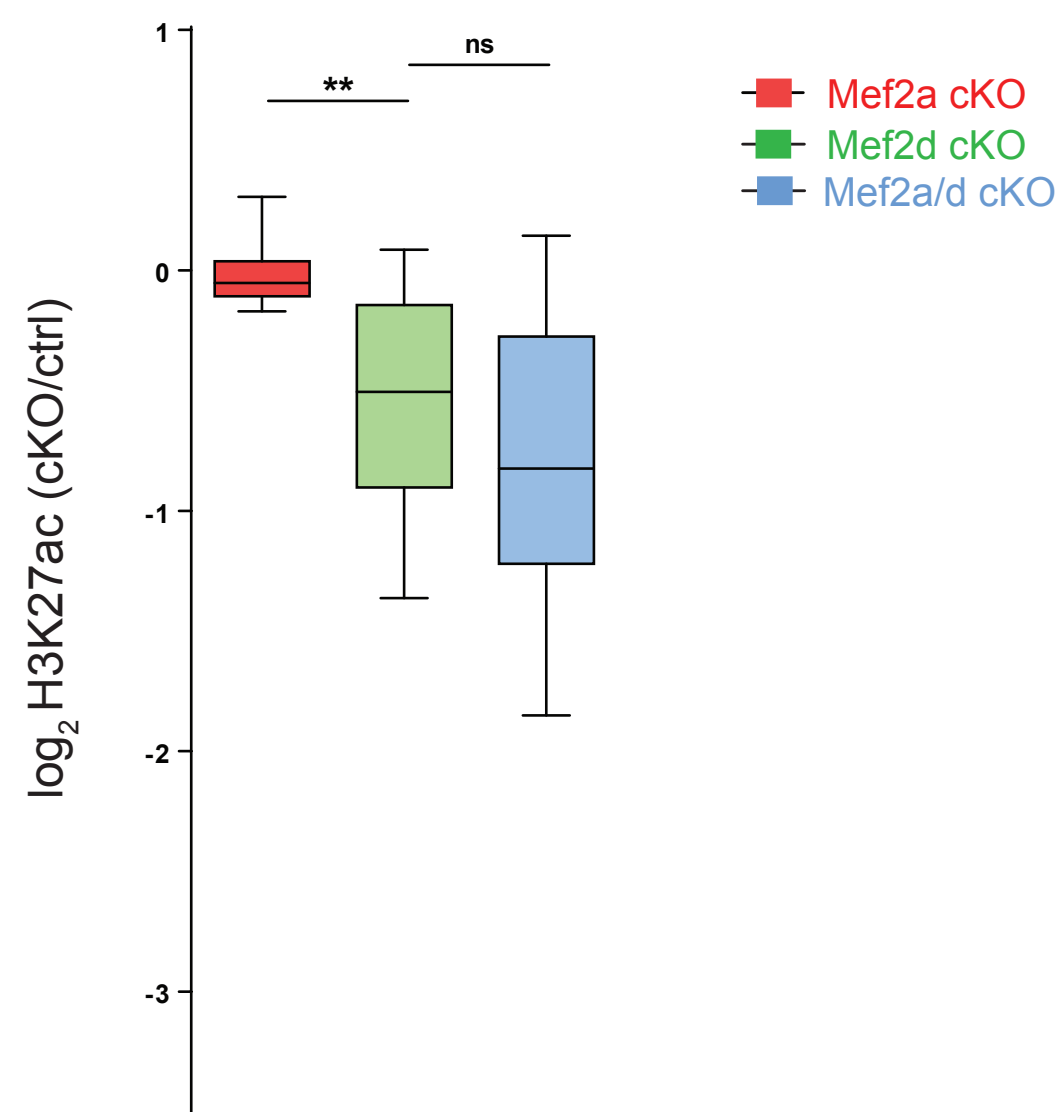

**Figure S4. (Related to Fig. 4): H3K27ac levels of MEF2 direct target genes in three MEF2 cKO conditions for RNA-seq Cluster 3.**

A. For non-compensatory direct target MEF2-activated genes (defined as genes from non-compensatory C3 Cluster associated with MEF2-bound sites): Box-whisker plots of log<sub>2</sub> transformed fold-change of H3K27ac in different cKO conditions over respective controls. Horizontal line inside box represents the median. Whiskers represent the 5th and 95th percentile; \*\*p<10<sup>-2</sup>, ANOVA followed by Tukey's multiple comparison test. n.s. not significant.

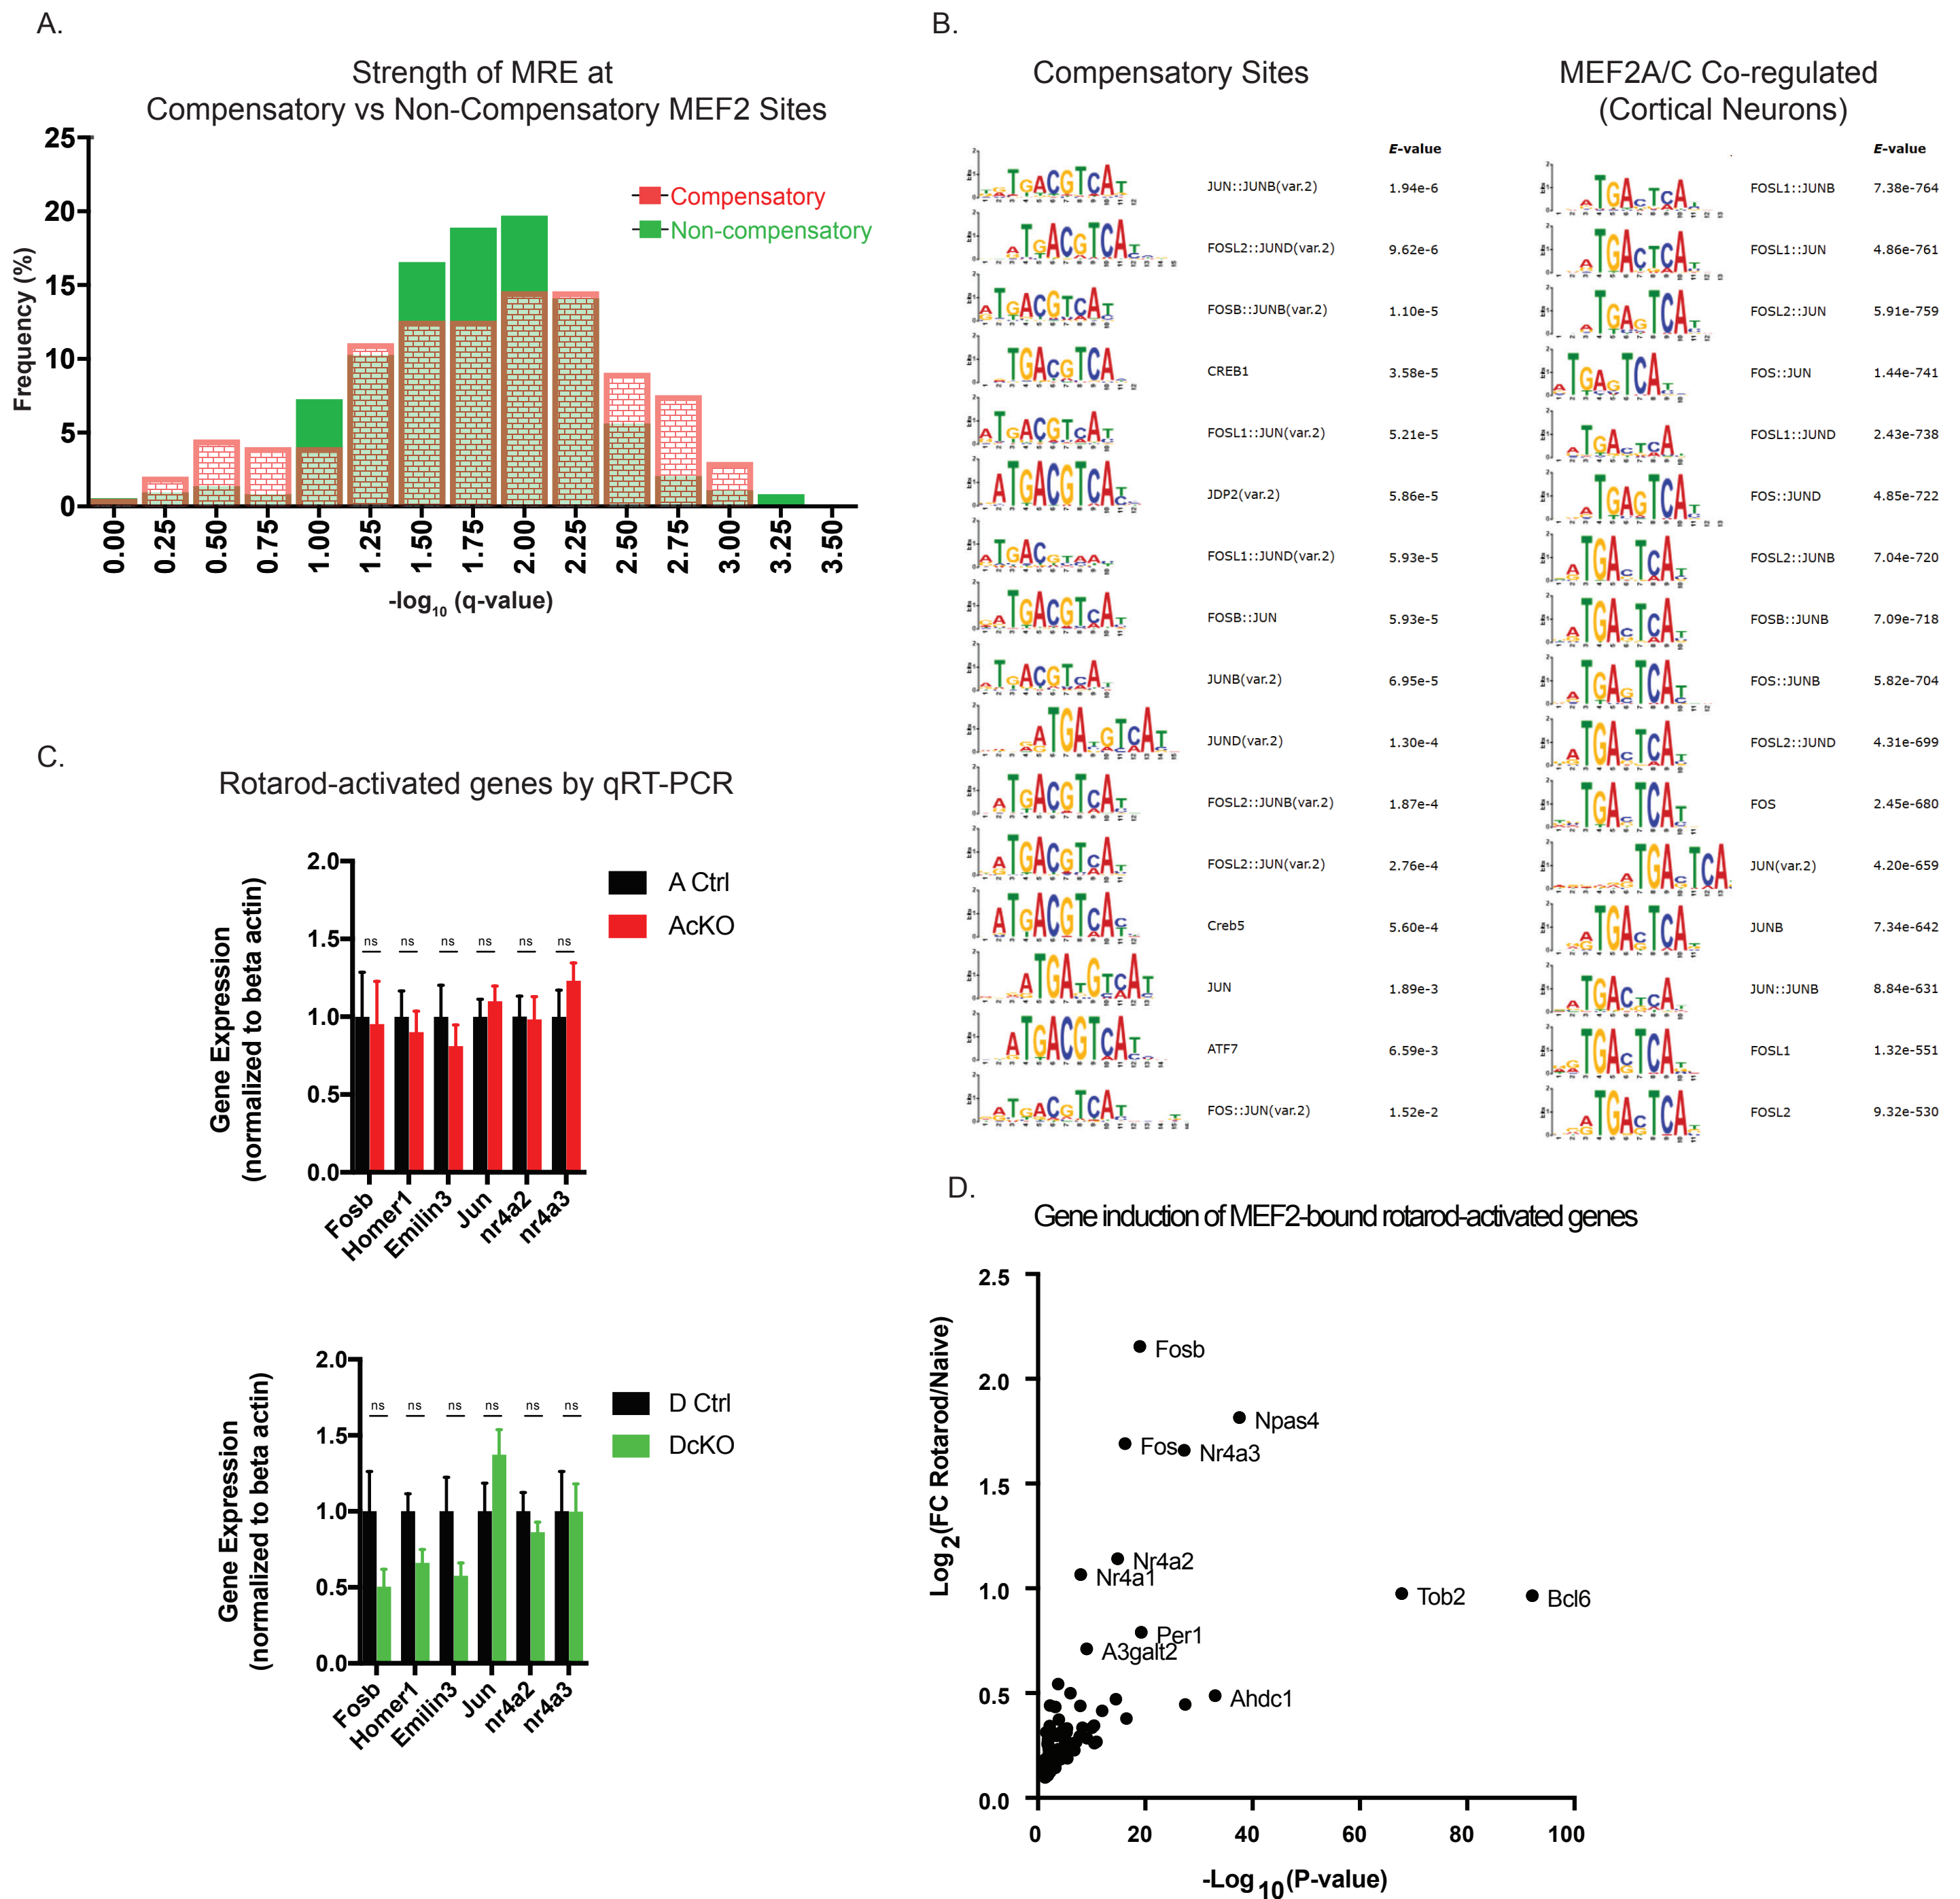

**Figure S5. (Related to Fig. 5): Differential motifs at compensatory compared to non-compensatory MEF2 sites.**

A. Histogram representing distribution of motif degeneracy scores quantified for detected MREs at compensatory (red) and non-compensatory (green) sites relative to a consensus MRE (see Methods for details).

B. All significant motifs identified by AME analysis for compensatory sites relative to non-compensatory sites shown as position weight matrix (left). Same number of top significant motifs shown for MEF2A and MEF2C co-regulated sites (right) (Telese et al., 2015). Following position weight matrix is the predicted binding factor(s), followed by q-value representing significance of relative enrichment (see Methods for details). The vast majority of identified motifs for both analyses are AP-1 components.

C. Rotarod paradigm performed for AcKO (red, top), DcKO (green, bottom), and respective control sex-matched littermate mice followed by quantitative reverse transcription PCR (qRT-PCR) on cerebellar RNA for select rotarod-activated genes experiencing compensatory MEF2A binding. Two-way repeated measures ANOVA, Sidak's multiple comparison test. n.s. not significant.

D. Volcano plot representing gene induction of MEF2-bound rotarod activated genes, shown as the log<sub>2</sub>-transformed fold changes (FC) of gene expression in the rotarod over the naïve condition for control mice (Yamada et al., 2019).
